1 **Title:** Proper control of R-loop homeostasis is required for maintenance of gene expression and  
2 neuronal function during aging

3 **Running title:** R-loop dysregulation in the aging eye

4  
5 **Authors:** Juan Jauregui-Lozano<sup>1</sup>, Alyssa Easton<sup>2</sup>, Spencer Escobedo<sup>1</sup>, Nadia A. Lanman<sup>3,4</sup>,  
6 Vikki M. Weake<sup>1,4</sup> and Hana Hall<sup>1,5</sup>

7 <sup>1</sup> Department of Biochemistry, Purdue University, West Lafayette, Indiana

8 <sup>2</sup> Department of Agricultural and Biological Engineering, Purdue University, West Lafayette,  
9 Indiana

10 <sup>3</sup> Department of Comparative Pathobiology, College of Veterinary Medicine, Purdue University,  
11 West Lafayette, IN.

12 <sup>4</sup> Purdue University Center for Cancer Research, Purdue University, West Lafayette, Indiana

13 <sup>5</sup> Purdue Institute for Integrative Neuroscience, Purdue University, West Lafayette, IN.

#### 14 **Correspondence**

15 Hana Hall, Department of Biochemistry, Purdue University, 175 S. University Street, West  
16 Lafayette, IN 47907, USA, Email: [hallh@purdue.edu](mailto:hallh@purdue.edu)

17

18 **Funding information:** Research reported in this publication was supported by the National Eye  
19 Institute of the NIH under Award Number 1R21EY031024-01 (to V.M.W. and H.H.) and  
20 2R01EY024905 to V.M.W.

21

22

23

24

25 **ABSTRACT**

26 Age-related loss of cellular function and increased cell death are characteristic hallmarks of  
27 aging. While defects in gene expression and RNA metabolism have been linked with age-  
28 associated human neuropathies, it is not clear how the changes that occur during aging  
29 contribute to loss of gene expression homeostasis. R-loops are DNA-RNA hybrids that typically  
30 form co-transcriptionally via annealing of the nascent RNA to the template DNA strand,  
31 displacing the non-template DNA strand. Dysregulation of R-loop homeostasis has been  
32 associated with both transcriptional impairment and genome instability. Importantly, a growing  
33 body of evidence links R-loop accumulation with cellular dysfunction, increased cell death and  
34 chronic disease onset. Here, we characterized the R-loop landscape in aging *Drosophila*  
35 *melanogaster* photoreceptor neurons. Our data shows that transcribed genes in *Drosophila*  
36 photoreceptor neurons accumulate R-loops during aging. Further, our data reveals an  
37 association between age-related R-loop accumulation and decreased expression of long and  
38 highly expressed genes. Lastly, we show that photoreceptor-specific depletion of Top3 $\beta$ , a  
39 DNA/RNA topoisomerase associated with R-loop resolution, leads to both downregulation of of  
40 long genes with neuronal function and decreased visual response in flies. Together, our studies  
41 present novel data showing increased levels of R-loop in aging photoreceptor neurons,  
42 highlighting the link between dysregulation of R-loop homeostasis, gene expression and visual  
43 function.

44 **KEYWORDS:** *Drosophila*, eye, aging, R-loop, transcription, visual, photoreceptors, neurons.

45

46

47

48

## 49 **1 INTRODUCTION**

50 Aging is a process characterized by a time-dependent decline in physiological homeostasis that  
51 eventually leads to a loss of organismal function and increased incidence of death (Partridge &  
52 Mangel, 1999). Characteristic functional changes include loss of gene and protein expression,  
53 mitochondrial dysfunction, cellular senescence, and stem cell exhaustion (López-Otín et al.,  
54 2013a). Aging is also a major contributor to development of many chronic diseases including  
55 ocular disease (Bonnell et al., 2003; Curcio, 2001; Gao & Hollyfield, 1992; Weale, 1998). Age-  
56 related vision loss and maculopathy have been associated with decreased density of retinal  
57 cells, including photoreceptors (Panda-Jonas et al., 1995). Specifically, the age-related decline  
58 in photoreceptors affects predominantly rods rather than cones (Jackson et al., 2002). In  
59 addition, emerging evidence links age-related neurological diseases, including retinal  
60 neuropathies, to defects in gene expression and RNA metabolism (Parapuram et al., 2010).  
61 Nonetheless, the molecular mechanisms that contribute to the age-associated susceptibility of  
62 the eye to disease development are poorly understood.

63 R-loops are three-stranded nucleic acid structures consisting of an RNA-DNA hybrid and a  
64 misplaced single-strand of DNA (Aguilera & García-Muse, 2012). They typically form during  
65 transcription in organisms ranging from yeast to humans (Aguilera & Gomez-Gonzalez, 2017)  
66 and play a significant role in normal cellular physiology, being required for the initiation of  
67 mitochondrial replication and class switch recombination (Mackay et al., 2020). Moreover,  
68 recent studies suggest that R-loops can dynamically regulate gene expression (Niehrs & Luke,  
69 2020). Due to their enrichment at gene termini, R-loops also modulate gene expression by  
70 preventing DNA methylation or limiting transcription factor access to promoters and facilitating  
71 efficient transcription termination at 3'-ends (Boque-Sastre et al., 2015; Skourti-Stathaki et al.,  
72 2011, 2014). Moreover, some genomic loci are more susceptible to R-loop formation: for  
73 example, R-loops correlate positively with increased transcription, gene length, and GC content

74 (Chan et al., 2014; Ginno et al., 2012; Gómez-González et al., 2011). Besides DNA sequence,  
75 R-loop formation is also determined by DNA topology. Topoisomerases are highly conserved  
76 enzymes that resolve topological stress during transcription and replication (McKinnon, 2016).  
77 Importantly, recent studies have shown that topoisomerases are critical for proper neuronal  
78 function (McKinnon, 2016). Topoisomerase 3 $\beta$  (Top3 $\beta$ ) is a member of the type IA superfamily  
79 of topoisomerases, which unwind negatively supercoiled DNA formed during transcription and  
80 replication, an activity that prevents R-loop formation (Drolet, 2006; Drolet et al., 1994, 1995).  
81 Loss of Top3 $\beta$  is associated with neurological disorders (Mackay et al., 2020) and has been  
82 shown to reduce lifespan in mice (Kwan & Wang, 2001).

83 Although R-loops are normal biological structures, their persistent formation is a major source of  
84 spontaneous DNA damage that can lead to transcriptional dysregulation and genome instability  
85 (Aguilera & García-Muse, 2012), two early hallmarks of aging (López-Otín et al., 2013a).

86 However, our understanding of the link between formation of R-loops and their impact on gene  
87 expression and cellular function during aging are quite limited. Due to high levels of transcription  
88 and alternative splicing, retinal cells and particularly photoreceptor neurons may be highly  
89 sensitive to RNA metabolism dysregulation (Fernandopulle et al., 2021). *Drosophila* compound  
90 eyes contain approximately 800 units called ommatidia with each consisting of 20 cells,  
91 including eight photoreceptor (PR) neurons (Carthew, 2007). The six outer PRs (R1-R6)  
92 expressing Rhodopsin 1 (Rh1) are mainly responsible for black and white vision and motion,  
93 and are similar to human rods. The inner PRs (R7 and R8) express Rh3/4 and Rh5/6,  
94 respectively, are responsible for color vision (Hardie, 1985) and resemble human cones. To  
95 characterize how aging impacts the genomic R-loop landscape in *Drosophila* photoreceptors,  
96 we isolated genetically labeled outer PRs using our recently improved nuclei immuno-  
97 enrichment (NIE) method (Jauregui-Lozano et al., 2021a) and performed MapR coupled with  
98 next generation sequencing (Yan & Sarma, 2020a) to map the genomic location of R-loops.

99 Here, we show that R-loop levels in photoreceptor neurons increase with age and that age-  
100 associated changes in the R-loop landscape are highly dynamic. Further, we show that genes  
101 enriched for genomic characteristic associated with R-loops, such as transcript levels and GC  
102 content, decrease expression with age. Finally, we show that depletion of DNA/RNA  
103 topoisomerase Top3 $\beta$  results in increased R-loop levels, reduced expression of long genes with  
104 neuronal function and reduced visual response. Together, our data show that aging is  
105 associated with increased levels of R-loops that correlate with decreased gene expression and  
106 visual function in photoreceptor neurons.

## 107 **2 RESULTS**

### 108 **2.1 Aging photoreceptor neurons show increased global levels of R-loops that correlate** 109 **with loss of function and precede age-associated retinal degeneration**

110 To examine the global levels of R-loops in photoreceptor neurons, we tagged the outer nuclear  
111 membrane of R1-R6 with GFP fused to the KASH domain of Msp300 protein using the Rh1-  
112 Gal4 driver, then isolated outer PR nuclei from the head homogenate with our tissue-specific  
113 (NIE method (Jauregui-Lozano et al., 2021b)). Next, we aged flies over the course of 50 days  
114 post-eclosion (emergence from the pupae), extracted genomic DNA from isolated PR nuclei at  
115 three time points (Figure 1A). We then assessed the global R-loop signal with a DNA slot blot  
116 assay using the S9.6 antibody, which recognizes RNA:DNA hybrids (Boguslawski et al., 1986).  
117 Specificity of S9.6 antibody towards RNA-DNA hybrids was shown by pre-treatment of DNA with  
118 ribonuclease H1 (RNase H1) that resulted in significant decrease of S9.6 signal (Figure 1B).  
119 Signal quantification showed over 20% increase in R-loop levels in PRs isolated from middle-  
120 aged, 30-day old flies (Rauser et al., 2005)(Rauser et al., 2005) as compared to that in young,  
121 10-day old flies. This trend continued with a significant increase of nearly 80% in global R-loop  
122 levels at day 50 (Figure 1B-C). These observations suggest that R-loops start accumulating  
123 early during photoreceptor aging, at a time point where flies show decreased visual function

124 (Hall et al., 2017). Importantly, using optical neutralization, which measures photoreceptor  
125 structural integrity with light microscopy, we observed no retinal degeneration by middle age,  
126 with a stochastic loss of rhabdomeres occurring after day 40 (Figure 1, Suppl. 1). Thus, our data  
127 shows that process of R-loop accumulation during aging precedes age-related retinal  
128 degeneration.

## 129 **2.2 Mapping genome-wide distribution of R-loops in aging PR neurons**

130 To determine the genomic landscape of R-loops in aging PRs, we coupled our NIE approach  
131 with MapR, a recently published R-loop mapping strategy based on the specificity of RNase H1  
132 enzyme to RNA:DNA hybrids, combined with the micrococcal nuclease (MNase)-based  
133 CUT&RUN technology (Yan et al., 2019a). MapR uses a recombinant mutant form of MNase-  
134 fused RNase H1, which binds but does not degrade the RNA moiety within an RNA-DNA hybrid  
135 ( $\Delta$ RH). Upon binding of the RNA-DNA hybrid by  $\Delta$ RH-MNase, MNase activation by addition  
136  $\text{Ca}^{2+}$  addition results in cleavage of surrounding DNA and a subsequent release of R-loop  
137 associated DNA, which is used for library preparation coupled with high-throughput sequencing  
138 (Figure 2A). Surprisingly, we found that coupling NIE-purified photoreceptor nuclei with the  
139 standard MapR protocol (Yan & Sarma, 2020a) yielded signal over genic regions resembling  
140 MNase-seq rather than R-loop specific enrichment. Our data showed MapR signal depletion  
141 around the Transcription Start Site (TSS) of genic regions (Suppl. Figure 2A), suggesting that  
142 our samples were being over-digested by MNase. We therefore modified the standard MapR  
143 protocol based on the recently published CUT&RUN protocol, which incorporates high calcium-  
144 low salt washing steps and decreased digestion time; both conditions have been shown to  
145 improve data quality for other applications (Meers, 2019). To validate the quality of our modified  
146 protocol, we compared our MapR data in *Drosophila* PRs to the original MapR data obtained in  
147 human HEK293T cells (Yan et al., 2019a) (Suppl. Figure 2B) and found that metagene profiles  
148 over the gene bodies showed similar R-loop distribution, with signal enrichment around the TSS

149 and the Transcription Termination Site (TTS) (Suppl. Figure 2A). Furthermore, the MapR signal  
150 was not detectable in control samples pre-treated with RNase H1 enzyme as shown by  
151 metagene plot and heatmap ranking genes based on MapR signal (Suppl. Figure 2C). These  
152 results were corroborated by genome browser analysis showing a significant MapR signal  
153 reduction across selected genomic regions (Suppl. Figure 2D), thus validating the specificity  
154 and high quality of our modified MapR method. As expected, the R-loop signal was greatly  
155 reduced in non-expressed genes compared to expressed genes (Suppl. Figure 2E).

156 We performed MapR in aging PRs at day 10, 30 and 50 post-eclosion using three independent  
157 biological replicates which generated at least  $3.5 \times 10^7$  uniquely mapped fragments per sample  
158 (Table 1). Spearman's correlation analysis based on read distribution over a 1000-bp binned  
159 genome, revealed a strong positive association amongst the biological replicates (Spearman's  $\rho$   
160  $\geq 0.96$ ). In contrast, when we compared the samples between the age time points, we observed  
161 lower positive association between day 10 and day 50 ( $\rho \geq 0.93$ ), suggesting that the R-loop  
162 landscape changed during aging (Figure 2B). This result was also observed by Principal  
163 Component Analysis (PCA) of the normalized R-loop distribution, which revealed that 53.8%  
164 variance amongst the samples for all biological replicates was attributed to age (Figure 2C).  
165 Notably, while samples clustered by age, the similarity between biological replicates decreased  
166 with age, suggesting that aging is associated with increased heterogeneity in R-loop distribution.

167 Next, we performed peak calling using the Model-based Analysis for ChIP-Seq (MACS2)  
168 algorithm (Y. Zhang et al., 2008). To account for the differences in the number of called peaks  
169 dependent on number of mapped fragments (Suppl. Figure 2F), we down-sampled each bam  
170 file to the same number of mapped fragments ( $3.5 \times 10^6$ ) and called the peaks. We found that  
171 peak distribution was stably maintained during aging, with approximately 60% of peaks being  
172 annotated to promoters ( $\text{TSS} \pm 2\text{kb}$ ) and approximately 25% of peaks annotated to introns  
173 (Figure 2D); this is consistent with previous reports of genome-wide distribution of R-loops

174 (Aguilera & Gomez-Gonzalez, 2017). Further, evaluation of the Fraction of Reads in Peaks  
175 (FRiP) score, which measures the quality of signal enrichment as defined by modENCODE  
176 (Landt et al., 2012), revealed consisted FRiP scores ( $<0.37$ ) for all samples (Figure 2E). Taken  
177 together, we successfully applied the MapR method to photoreceptors isolated from the whole  
178 organism to produce high quality R-loop mapping data, showing that the genome-wide R-loop  
179 landscape of the PR undergoes age-associated changes.

### 180 **2.3 Age-associated changes in R-loop levels in PR neurons are highly dynamic**

181 Since R-loops typically form co-transcriptionally, we next examined global and locus-specific  
182 distribution of age-associated changes in R-loops across actively transcribed genes, defined as  
183 having more than seven transcripts per million (TPM). First, we analyzed global R-loop signal  
184 over gene bodies for actively expressed genes and compared the average signal across the  
185 gene, as counts per million (CPM). As expected, R-loop signal was enriched mainly over TSS  
186 and towards the 3' ends of genes across all age time points (Figure 3A). However, the  
187 landscape of R-loop distribution changed with age; while R-loop levels decreased over TSS,  
188 they increased over gene bodies and 3' ends of genes in old PR when compared to young PRs.

189 We next characterized the direction and temporal pattern of the altered R-loop landscape in  
190 more detail, thus, obtaining a ratio of the CPM-normalized counts between day 30 and day 10  
191 samples (Early aging) and day 50 and day 30 samples (Late aging) across all expressed genes.  
192 Fold change data was then log transformed to center “no-change” signal around 0 (Figure 3B-  
193 bottom). Metaplot analysis of R-loop fold change over gene bodies showed that there was a  
194 substantial gain in R-loops at TSS across the expressed genes early in aging (Figure 3B-left).  
195 However, the dynamics of R-loop distribution changed dramatically late in aging when we  
196 observed decreased R-loop signal over TSS with concomitant R-loop gain over promoters and  
197 across gene bodies (Figure 3B-right). Thus, our data suggest that R-loop homeostasis is



198 regulated in spatiotemporal manner during aging, rather than in steady and progressive age-  
199 dependent changes across the genome.

200 To further evaluate how R-loop genomic coverage changed with age, we asked whether the  
201 age-associated increase in R-loops could be a consequence of broadening of the peaks.

202 Supporting this hypothesis, metaplots of CPM-normalized MapR signal aligned to peak center  
203 between time points showed that overall, peaks increased width with age (Figure 3C). Next, we  
204 quantified global R-loop coverage, as defined by the sum of peak width for each time point.

205 Notably, R-loop peaks covered approximately 18.7 megabases (Mb) of the genome at day 50,  
206 compared to 18.1 Mb at day 10, showing a modest but significant increase in coverage during  
207 aging (t-test,  $p < 0.022$ ) (Figure 3D). Supporting this data, violin plots depicting the peak width for  
208 all peaks revealed a slight but consistent increase in peak width at day 30 and day 50 as  
209 compared to that at day 10 (Suppl. Figure 3B). Given the 180 Mb total size of the *Drosophila*  
210 genome (Adams, 2000), our data showed that in *Drosophila* photoreceptor neurons, R-loops  
211 covered approximately 10% of the genome, which is similar to the genomic R-loop coverage  
212 obtained from other organisms, including mammals (Manzo et al., 2018; Sanz et al., 2016a;  
213 Villarreal et al., 2020).

214 To identify age-regulated R-loop peaks, we quantified MACS2-called peaks and obtained  
215 differential R-loop signal (DRS) using a csaw and EdgeR pipeline (Lun & Smyth, 2016;  
216 Robinson et al., 2010). DRS analysis revealed that either in early or late aging, the number of  
217 peaks that increased or decreased signal, as measured by fold change in CPM, was stably  
218 maintained ( $p\text{-adj} < 0.05$ ,  $|FC| > 1.2$ ), with 13% and 18% of peaks with DRS in early and late  
219 aging, respectively (Supp. Figure 3B), suggesting that the landscape of age-regulated R-loops  
220 was heterogeneous. To further evaluate the genomic distribution of age-regulated R-loops, we  
221 analyzed MapR peak occupancy changes during aging based on their distribution over genic  
222 loci, specifically at the Promoter-TSS, 5' untranslated regions (UTR), exons, introns, 3'UTR and

223 TSS regions (Figure 3E-top). Early in aging, there was a gain in the number of R-loop peaks at  
224 5' UTR, exons and TTS of genic regions. While introns showed a loss in the number of R-loop  
225 peaks, there was no difference in the peak number over promoter-TSS and 3' UTR regions  
226 early in aging. In contrast, promoter-TSS and 5' UTR regions lost R-loop peaks late in aging  
227 with no significant difference in the number of peaks at TTS. Both, exons and introns showed  
228 similar trends of R-loop peak gains and losses, respectively. Collectively, R-loop distributions  
229 exhibited highly dynamic changes during aging across different regions of actively transcribed  
230 genes, suggesting differential regulation of R-loop homeostasis associated with different stages  
231 of transcription.

#### 232 **2.4 Age-related R-loop accumulation is associated with specific genomic features and** 233 **decreased expression of long and highly expressed genes**

234 R-loop formation is typically associated with specific genic characteristics such as gene  
235 expression level, torsional stress, and GC content (Allison & Wang, 2019; Chedin & Benham,  
236 2020). To determine whether any of these features were associated with increased changes in  
237 R-loops in aging PR neurons, we compared the fold change in R-loop signal around TSS ( $\pm 3$   
238 kb) and TTS ( $\pm 3$  kb) at day 50 relative to day 10, as previously described (see section 2.3).  
239 Heatmap plots of photoreceptor-expressed genes ranked based on their fold change in the R-  
240 loop signal showed that majority of the TSS-associated R-loops increased with age, while only  
241 approximately 50% genes had an increase in R-loop signal around TTS. (Figure 4A). Notably,  
242 genes with R-loop gains around the TSS had higher GC content than genes with R-loop losses  
243 (Wilcoxon-test,  $p < 2.2 \times 10^{-5}$ ), with no statistically significant enrichment for long or highly  
244 expressed genes (Figure 4B). However, the genes with age-related R-loop gains around the  
245 TTS were enriched for GC rich, long and highly expressed genes (Kruskal-Wallis,  $p < 4.5 \times 10^{-2}$ ,  
246  $p < 4.5 \times 10^{-4}$ , and  $p < 2.1 \times 10^{-9}$ , respectively) (Figure 4C). Taken together, these data show that  
247 age-related R-loop formation is associated with specific genomic features and enriched at long

248 and highly expressed genes. Since the photoreceptor-specific genes that decrease expression  
249 with age are enriched for long and highly expressed genes (Hall, 2017), we next investigated if  
250 age-related transcriptome changes had significant enrichment for genomic features associated  
251 with R-loop hotspots. Transcriptome profiling of PRs isolated from flies at day 10 and 50  
252 revealed that 1512 genes were age-regulated (16%), with 351 genes (23%) decreasing  
253 expression and 1161 genes (76%) increasing expression ( $p\text{-adj}<0.05$ ,  $|FC|>1.5$ ) (Figure 4D).  
254 Since persistent formation of R-loops can inhibit transcription (Belotserkovskii et al., 2010; Sanz  
255 et al., 2016b), we next asked whether genes that changed expression during aging were  
256 enriched for genomic characteristics associated with increased R-loop formation, such as GC  
257 skew, gene length, and transcription levels. To do this, we generated Receiver Operating  
258 Characteristic (ROC) curves to assess the ability of each individual genomic feature to identify  
259 whether a gene would change expression with age. Notably, we found that genes that  
260 decreased expression with age were enriched for long and highly expressed genes as shown by  
261 area under the curve analysis (AUC=0.62 and 0.80, respectively) (Figure 4E). In contrast, genes  
262 that increased expression with age did not show any specific genomic characteristics. Taken  
263 together, these observations suggest that R-loop accumulation correlated with decreased  
264 transcription of long and highly expressed genes in aging PRs, while there was no correlation  
265 between the genes that increased expression and R-loop formation.

## 266 **2.5 Loss of *Drosophila* Top3 $\beta$ leads to increase in R-loop levels**

267 The neuronal transcriptome is enriched for long and highly expressed genes, that undergo high  
268 level of torsional stress during transcription (King et al., 2013; Liu & Wang, 1987). To solve DNA  
269 and RNA topological problems, cells use conserved topoisomerase enzymes that play a critical  
270 role in a wide range of fundamental metabolic processes in the genome (Pommier et al., 2016;  
271 Wang, 2002). Top3 $\beta$  is a highly conserved, dual-activity topoisomerase in animals that can  
272 change the topology of both DNA and RNA (Xu et al., 2013). Top3 $\beta$  can unwind negatively

273 supercoiled DNA that forms during transcription, an activity that prevents formation of R-loops  
274 (Chedin & Benham, 2020). Loss of Top3 $\beta$  function is associated with increased R-loop levels in  
275 mammalian cells (X. Yang et al., 2000; T. Zhang et al., 2020) and has been shown to reduce  
276 lifespan in mice (Kwan & Wang, 2001). In addition, mutations in Top3 $\beta$  are linked to  
277 neurological disorders, thus highlighting the critical role of Top3 $\beta$  in neuronal function (Joo et al.,  
278 2020). To determine the role of *Drosophila* Top3 $\beta$  in regulation of R-loop homeostasis, we first  
279 depleted Top3 $\beta$  with ubiquitous RNAi in larvae (*tubP-Gal4>UAS-RNAi*). Using DNA slot blot and  
280 RNA-DNA-specific antibody S9.6, we detected a 10% increase in R-loop levels in Top3 $\beta$ -  
281 depleted samples as compared to a control expressing non-specific RNAi (Figure 5A). Pre-  
282 treatment of DNA samples with RNase H1 led to a complete loss of the signal (Figure 5A),  
283 showing the specificity of the signal for RNA-DNA hybrids. qRT-PCR analysis of Top3 $\beta$   
284 transcript levels showed approximately 80% reduction in Top3 $\beta$ -depleted samples as compared  
285 to a control, thus validating the efficiency of the knockdown (Figure. 5C). Taken together, these  
286 data show the conserved role of Top3 $\beta$  in R-loop homeostasis in *Drosophila*.

287 Since loss of Top3 $\beta$  in *Drosophila* and mice leads to several neuronal phenotypes, such as  
288 disruption of synapse formation and behavioral impairments, we were next interested to see if  
289 depletion of Top3 $\beta$  specifically in PR neurons had any impact on visual function. Like most flying  
290 insects, *Drosophila* move towards light, thus exhibiting positive phototaxis (Choe & Clandinin,  
291 2005). Importantly, we and others showed that positive phototaxis declines with age in flies  
292 (Carbone et al., 2016; Grotewiel et al., 2005; Hall et al., 2017; Simon et al., 2006). To assess  
293 visual behavior, we depleted Top3 $\beta$  specifically in photoreceptors using *Rh1-Gal4>UAS-RNAi*  
294 and performed phototaxis assays at days 10 and 30 post-eclosion. As expected, there was  
295 approximately 15% decrease in positive phototaxis in the control flies between day 10 and day  
296 30 (Wilcoxon test, p-value<0.037) (Figure 5D). Notably, while flies with PR-specific depletion of  
297 Top3 $\beta$  showed no difference in the phototactic response at day 10, they showed approximately

298 60% decrease in visual behavior at day 30 as compared to a control (Wilcoxon test, p-  
299 value<0.47, and <0.015, respectively) (Figure 5D). Importantly, this decrease in visual behavior  
300 was not due to the loss of PR neurons, as optical neutralization showed no retinal degeneration  
301 in Rh1>siTop3 $\beta$  flies at day 30 post-eclosion (Figure 5E). Taken together, these data suggest  
302 that Top3 $\beta$  is required for maintenance of proper visual function in aging *Drosophila*  
303 photoreceptor neurons.

## 304 **2.6 Top3 $\beta$ regulates expression of a subset of long genes associated with neuronal** 305 **function in photoreceptors**

306 Given the role of Top3 $\beta$  in the resolution of torsional stress during transcription, we next  
307 hypothesized that Top3 $\beta$  might be required to regulate the expression of genes with neuronal  
308 function. To test this hypothesis, we analyzed the transcriptome of PR neurons depleted for  
309 Top3 $\beta$  in *Rh1-Gal4>UAS-RNAi; UAS-GFP<sup>KASH</sup>* flies at day 30 using our NIE protocol. Differential  
310 expression analysis using DESeq2 (Love et al., 2014), between Top3 $\beta$ -RNAi and control,  
311 revealed that 1% of genes were regulated by Top3 $\beta$  (66 out 6500, p-adj<0.05, |FC|>1.4) (Figure  
312 6A). Additionally, quantitative analysis of gene length based on whether a gene was age-  
313 regulated revealed that genes with decreased expression in Top3 $\beta$ -depleted PRs were highly  
314 enriched for long genes relative to genes that increased or did not change expression (Wilcoxon  
315 test, p<1.2e<sup>-3</sup> and <2.4x10<sup>-9</sup>, respectively) (Figure 6B). Gene Ontology (GO) enrichment analysis  
316 of these Top3 $\beta$ -dependent genes revealed that genes with decreased expression were highly  
317 enriched for genes with neuronal functions, as shown by the gene concept network analysis  
318 (Cnetplot) (Figure 6C). These genes included *Tenascin major* (*Ten-m; FBgn0004449*) and  
319 *Tenascin accessory* (*Ten-a; FBgn0267001*), which form a transmembrane heterodimer involved  
320 in synapsis regulation (Mosca et al., 2012; Sun & Xie, 2012), *Tripartite motif containing 9*  
321 (*Trim9; FBgn0051721*), a E3 ubiquitin ligase involved in neurogenesis, axon guidance, and eye  
322 development (Akin & Zipursky, 2016; Morikawa et al., 2011), and *knockout* (*ko; FBgn0020294*),

323 a storkhead-box protein involved in axon guidance (Hartmann et al., 1997). Importantly, GO  
324 term analysis of up-regulated genes did not lead to any significant biological category  
325 enrichment, highlighting the role of Top3 $\beta$  in maintaining transcript levels of long genes.

326 Lastly, we sought to evaluate if Top3 $\beta$ -dependent genes were also mis-regulated during natural  
327 aging in PR neurons. Gene length analysis of age-regulated genes revealed that genes with  
328 decreased expression were longer relative to genes that increased or did not change  
329 expression, between day 50 and 10 (Wilcoxon test,  $p < 2.2 \times 10^{-16}$ ) (Figure 6D), consistent with our  
330 ROC analysis. Strikingly, genes that increased expression during aging were also slightly longer  
331 in average than the genes that did not change expression, suggesting that photoreceptor  
332 neurons might possess additional mechanisms that positively regulate the expression of a  
333 subset of long genes independent of Top3 $\beta$  (Figure 6D). To further assess if Top3 $\beta$ -dependent  
334 genes that decreased expression with age were associated with neuronal function, we  
335 compared the aging transcriptome (day 50 vs day 10) to Top3 $\beta$ -dependent genes. We identified  
336 a significant number of long Top3 $\beta$ -dependent genes (length < 80 kB) with decreased  
337 expression in aging PRs that are linked with neuronal function (Figure 6E). These include genes  
338 such as *eyeless*, a transcription factor involved in retinal determination gene network (*ey*;  
339 FBgn0005558) (Graw, 2017), *fruitless*, a transcription factor involved in neuronal circuits (*fru*;  
340 FBgn0004652) (Yamamoto et al., 1998), *Anion exchanger 2*, an anion:anion antiporter (*Ae2*;  
341 FBgn0036043) (Bosman et al., 1996, 1998), and *Tenascin major* (*Ten-M*; FBgn0004449) (DePew  
342 et al., 2019).

343 Further, analysis of MapR fold change signal over gene bodies during aging for Top3 $\beta$ -  
344 dependent genes revealed that a subset of genes that are transcriptionally regulated by Top3 $\beta$   
345 accumulated R-loops with age (Fig. 6F). In addition, detailed analysis of our recent proteomic  
346 studies in the aging *Drosophila* eye (Hall et al., 2021) revealed a statistically significant 20%  
347 decrease in Top3 $\beta$  protein levels during aging (Fig. 6G).

348 Collectively, our data show that Top3 $\beta$  is required to maintain expression of a specific subset of  
349 genes with neuronal function that tend to be very long and thus are most likely sensitive to loss  
350 of topoisomerase activity due to high levels of torsional stress. This suggests that during aging,  
351 proper levels of Top3 $\beta$  are required to maintain R-loop homeostasis and expression of genes  
352 important for visual function.

### 353 **3 DISCUSSION**

354 R-loops have been shown to form in wide range of organisms, including humans (Gomez-  
355 Gonzalez & Aguilera, 2019). While R-loops were previously considered to be mere byproducts  
356 of transcription, it has been demonstrated that R-loops play a significant physiological role in  
357 cellular biology. Notably, there is a growing body of evidence that links R-loop accumulation to  
358 transcriptional imbalance and genomic instability, two main hallmarks of aging (López-Otín et  
359 al., 2013b). Furthermore, dysregulation of R-loop homeostasis has been linked to human  
360 pathologies, including neurodegeneration (Groh & Gromak, 2014). Since age is the main risk  
361 factor for many neurodegenerative diseases, our current study focused on characterizing the  
362 changes in R-loop landscape induced during aging and evaluating the impact of R-loops on the  
363 gene expression, specifically in *Drosophila* photoreceptor neurons.

364 Characterization of global R-loop levels in aging PRs showed that there was a significant  
365 increase in R-loops by middle age, with an additional increase late in aging. To further evaluate  
366 the R-loop distribution genome-wide, we optimized a recently published R-loop mapping  
367 strategy, called MapR, coupled with high-throughput sequencing. Since this method involves  
368 incubation of isolated nuclei/cells with a recombinant mutant form of RNaseH1 tethered with  
369 MNase and thus does not require modification of the organismal genome, it is suitable for  
370 studies in whole animals. Our data demonstrated that R-loops covered approximately 10% of  
371 the *Drosophila* PR genome, which is similar to the reported genomic distribution of R-loops in  
372 other organisms (Sanz et al., 2016b; Wahba et al., 2016). Moreover, as expected, R-loops were



373 enriched over known genomic hot-spots such gene promoters and terminators (Niehrs & Luke,  
374 2020). Our data further revealed that age-associated changes in R-loop occupancy were highly  
375 complex and regulated in a spatiotemporal manner, exemplified by differential R-loop  
376 distribution across the genome during early and late aging. Specifically, we found that some  
377 regions within gene bodies were more prone to changes in R-loop occupancy than others. Even  
378 by middle age, we observed significant gains in R-loop levels mainly over TSS of expressed  
379 genes. In contrast, the R-loop landscape changed substantially late in aging, when we observed  
380 most R-loop gains over the gene bodies and towards the TTS. R-loops are known to play a key  
381 physiological role in transcription regulation due to their presence at promoters and terminators,  
382 where they regulate transcription initiation and termination, respectively (Niehrs & Luke, 2020).  
383 However, if R-loops are not removed efficiently, they can negatively impact transcription  
384 (Belotserkovskii et al., 2010; Sanz et al., 2016b). Indeed, our transcriptome profiling reveals that  
385 by middle age, flies show decreased expression of genes with neuronal function, inversely  
386 correlating with increased levels of R-loops during aging. Furthermore, we found that while  
387 exons showed an overall increase in R-loops with age, introns showed the opposite trend.  
388 Because aging is associated with altered regulation of splicing (Stegeman et al., 2018) and  
389 genes with a role in RNA processing including splicing decrease expression during aging (Hall  
390 et al., 2017), imbalance in splicing regulation may result in disproportional gains of R-loops over  
391 the exons of transcribed genes.

392 Detailed analysis of genomic features for genes that accumulated R-loops around either the  
393 TSS or the TTS revealed a bias for GC% rich genes. Recent systematic analysis of the aging  
394 transcriptome of multiple organisms and cell types showed a positive correlation between  
395 transcriptional downregulation and specific genomic features, such as gene length and GC  
396 content (Stoeger et al., 2019). Thus, R-loop accumulation over specific genomic regions and



397 their contribution to the regulation of the aging transcriptome might be conserved in other  
398 organisms.

399 One of the major driving forces of R-loop accumulation is topological stress that arises from  
400 under- and over-winding of the double helix during transcription and replication (McKinnon,  
401 2016). Notably, long genes accumulate high topological stress during transcription and loss of  
402 topoisomerase activity has been shown to preferentially inhibit expression of long genes (Joshi  
403 et al., 2012; Keszthelyi et al., 2016). Since age-associated R-loop gains were particularly  
404 localized at long and highly expressed genes, we sought to further explore the impact of  
405 decreased topoisomerase activity on the maintenance of photoreceptor neuron homeostasis.  
406 We focused on the DNA/RNA topoisomerase Top3 $\beta$  because loss of Top3 $\beta$  function is  
407 associated with increased R-loop levels in mammalian cells (Y. Yang et al., 2014; T. Zhang et  
408 al., 2020). In addition, mutations in Top3 $\beta$  are linked to neurological disorders, thus highlighting  
409 the critical role of Top3 $\beta$  in neuronal function (Joo et al., 2020). Notably, we demonstrated that  
410 normal Top3 $\beta$  levels were required for maintenance of neuronal function, as shown by an age-  
411 associated decrease in visual behavior upon photoreceptor-specific downregulation of Top3 $\beta$ . In  
412 addition, depletion of Top3 $\beta$  in PRs leads to decreased expression of a subset of long genes  
413 with neuronal function, some of which also gained R-loop levels with age. Because proteomic  
414 analysis of *Drosophila* eyes shows decreased protein levels of Top3 $\beta$  with age, our data  
415 suggests that Top3 $\beta$  may function in maintenance of R-loop homeostasis and gene expression  
416 required for proper neuronal function.

417 Aging is characterized by a progressive and time dependent deterioration of an organism that  
418 eventually leads to loss of cellular function and increased cell death (Partridge & Mangel, 1999).  
419 The hallmarks of aging include alteration in gene expression, changes to the epigenome, loss of  
420 protein homeostasis, and increased cellular senescence (López-Otín et al., 2013b). Our current  
421 studies demonstrate a novel finding: *Drosophila* photoreceptor neurons accumulate R-loops

422 during aging, and these age-associated changes in R-loop occupancy are highly dynamic and  
423 regulated in a spatiotemporal manner. Specifically, gene bodies show significant gains in R-  
424 loops late in aging, and long, highly-expressed genes are especially prone to R-loop  
425 accumulation. Furthermore, the results of this study highlight the role of Top3 $\beta$  in maintenance  
426 of R-loop homeostasis and proper expression of a specific subset of long genes with neuronal  
427 function during aging.

## 428 **4 EXPERIMENTAL PROCEDURES**

### 429 **Fly maintenance**

430 Flies were raised in 12:12 h light:dark cycle at 25°C on standard fly food (Lewis, 1960). For  
431 aging experiments, flies were collected over three days post-eclosion and maintained in  
432 population cages with a density of ~1000 flies/cage with fresh fly food change every two days.  
433 Male flies were aged to the specified age, collected and flash-frozen in liquid nitrogen at  
434 Zeitgeber time 6 (-/+ 1 hour).

### 435 **Nuclei Immuno-Enrichment (NIE) protocol**

436 NIE was performed as described previously (Jauregui-Lozano, 2021). Detailed protocol can be  
437 found at [dx.doi.org/10.17504/protocols.io.buiqnuDW](https://dx.doi.org/10.17504/protocols.io.buiqnuDW)

### 438 **Slot blot**

439 DNA was extracted using Quick DNA MiniPrep Plus Kit (Zymo Research, Catalog #D4068)  
440 following the instructions for tissue homogenization. DNA concentration was measured using  
441 Qubit dsDNA settings. 35-50 ng of DNA was loaded on a Hybond-N<sup>+</sup> membrane (GE Healthcare,  
442 Catalog #RPN119B) using slot blot apparatus. After drying, the membrane was blocked using 5%  
443 milk in PBST, then incubated with anti-S9.6 antibody in PBST (Millipore Sigma, Catalog #  
444 MABE1095), followed by goat anti-mouse HRP antibody (BioRad, Catalog #170-6516). For  
445 loading control, membranes were denatured in 0.5 M NaOH, 1.5 M NaCl for 10 min at RT, followed  
446 by 10 min-wash in PBST and neutralized in 1.5 M NaCl, 0.5 M TrisCl for 10 min at RT. The

447 membrane was then washed with PBST for 10 min, blocked in 5% milk PBST for 30 min, and  
448 incubated with mouse anti single-stranded DNA antibody (MilliporeSigma, Catalog #MAB3034),  
449 followed by goat-anti-mouse HRP antibody (BioRad, Catalog#170-6516). To test the S9.6  
450 antibody specificity, half of the DNA samples were treated with RNase H enzyme (10U) at 37°C  
451 for at least 3 HR or over/night.

#### 452 **GST- $\Delta$ Rh-MNase and GST-MNase protein purification**

453 Protein overexpression and purification were performed as described previously (Yan & Sarma,  
454 2020a). *Protein overexpression*: BL21 (DE3) competent *E. coli* cells (NEB, Ipswich, MA, Catalog  
455 #C2527H) were transformed with 10 ng of either pGEX-6p-1-GST-MNase or pGEX-6p-1-GST-  
456  $\Delta$ RNH-MNase plasmid (Addgene, Watertown, MA, Catalog #136291 and 136292, respectively).  
457 Transformed bacteria were grown in 500 mL of standard LB media (*LB (Luria-Bertani) Liquid*  
458 *Medium*, n.d.) supplemented with 100  $\mu$ M Carbenicillin at 37°C. Once optical density reached  
459 0.5 at 600 nm, protein expression was induced with 1 mM IPTG and cultures were grown at  
460 37°C for additional 3 hours under constant rotation. Cells were pelleted using at 4°C, 8000 RPM  
461 for 10 minutes. *Protein purification*: Bacterial pellets were resuspended in ice-cold 1X PBS  
462 buffer (ThermoFisher, Waltham, MA, Catalog #70011-044) and sonicated using a Branson  
463 Digital Sonifier in five 15sec-45sec ON/OFF cycles. Pierce™ Glutathione Magnetic Agarose  
464 Beads (Thermo Fisher, Catalog #78601) were used to purify GST-tagged MNase and RNaseH-  
465 MNase recombinant proteins according to manufacturer's instructions.

#### 466 **Improved MapR**

467 To profile genome-wide distribution of R-loops, we followed the MapR protocol (Yan et al.,  
468 2019) with some modifications according to the improved CUT&RUN protocol to decrease  
469 background MNase cleavage and digestion (Meers et al., 2019). Briefly, isolated nuclei were  
470 washed with 1 mL of Digitonin-containing wash buffer (20 mM HEPES-NaOH, 150 mM NaCl,  
471 0.5 mM Spermidine, 0.02% Digitonin) freshly supplemented with EDTA-free cComplete protease

472 inhibitors (Sigma-Aldrich, St. Louis, MO, Catalog #11873580001). Nuclei were resuspended in  
473 150  $\mu$ l of Digitonin-containing wash buffer and 1  $\mu$ M GST- $\Delta$ Rh-MNase or GST-MNase was  
474 added to a final concentration followed by one-hour incubation at 4°C with constant rotation.  
475 Nuclei were washed three times with 500  $\mu$ l Digitonin-containing wash buffer, then washed one  
476 time with 1 mL of Low-Salt Rinse Buffer (20 mM HEPES, pH7.5, 0.5 mM spermidine, 0.05%  
477 Digitonin) freshly supplemented with EDTA-free complete protease inhibitor. Nuclei were  
478 resuspended in 200  $\mu$ l of ice-cold calcium containing Incubation buffer (3.5 mM HEPES pH 7.5,  
479 10 mM CaCl<sub>2</sub>, 0.05% Digitonin) and placed on wet ice for 60 seconds. Upon removal of  
480 supernatant, nuclei were resuspended in 150  $\mu$ l of EGTA-STOP buffer (170 mM NaCl, 20 mM  
481 EGTA, 0.05% Digitonin, 20  $\mu$ g/ml glycogen, 25  $\mu$ g/ml RNase A), followed by 30-minute  
482 incubation at 37°C. DNA was extracted using Quick-DNA Microprep Kit (Zymo Research, Irvine,  
483 CA, Catalog #D4074). DNA was quantified with Qubit 1X HS DNA (ThermoScientific,  
484 Catalog#Q33203) and 2 ng of purified DNA was used to make sequencing libraries with Tecan  
485 Ovation Ultralow V2 DNA-Seq Library Preparation Kit-Unique Dual Indexes (Tecan,  
486 Switzerland, Catalog #9149-A01). Up to 16 libraries were pooled in one lane for paired-end 150  
487 bp Illumina HiSeq sequencing.

#### 488 **RNA-seq**

489 Isolated nuclei were resuspended in 100  $\mu$ l TRI reagent (Zymo Research, Irvine CA, Catalog  
490 #R2050-1-200) and incubated at RT for 1 hour, followed by RNA extraction using the Direct-  
491 zol™ RNA Microprep (Zymo Research, Catalog #R2061). Purified RNA was quantified with the  
492 Qubit™ RNA HS Assay Kit (ThermoFisher, Catalog #Q32852) as per the manufacturers'  
493 instructions. cDNA libraries were prepared with 10 ng of nuclear RNA using Ovation SoLo RNA-  
494 seq System including *Drosophila*-specific anyDeplete technology for rRNA depletion (Tecan,  
495 Redwood City, CA, Catalog #0502-32). Up to 16 libraries were pooled in one lane for paired-end  
496 150 bp Illumina HiSeq sequencing.

#### 497 **Quantitative PCR (qRT-PCR)**

498 cDNA was synthesized using 300 ng of RNA using EpiScript RNase H- Reverse Transcriptase  
499 (Lucigen, Middleton, WI, Catalog #ERT12910K). qRT-PCR was performed using Bullseye  
500 EvaGreen qPCR 2X master mix-ROX (Midsci, Valley Park, MO, Catalog #BEQPCR-R) and  
501 using the following primers for *eIF-1a* forward 5'-GCTGGGCAACGGTCGTCTGGAGGC-3' and  
502 reverse 5'-CGTCTTCAGGTTCTGGCCTCGTCCGG-3'; and for *Top3β* forward 5'-  
503 GAATGGGCGCGCGGTCGGGTC-3' and reverse 5'-  
504 CGCATCAGTTCGACGGTGTTTCAGTGCC-3'.

### 505 **Optic Neutralization**

506 Flies were anesthetized on a CO<sub>2</sub> pad and glued to a glass slide. Live rhabdomeres were  
507 imaged using brightfield light microscopy in an Olympus BX51 microscope, as described  
508 previously (Stegeman et al., 2018).

### 509 **Bioinformatic analysis**

510 Raw reads were trimmed using Trimmomatic version 0.39 (Bolger et al., 2014) to filter out low  
511 quality reads (Q>30) and clean adapter reads. Cleaned reads were aligned to the *Drosophila*  
512 *melanogaster* genome (BDGP Release 6 + ISO1 MT/dm6 from UCSC) using splicing-aware  
513 aligner STAR version 1.3 (Dobin et al., 2013) for RNA-seq and Bowtie2 version 2.3.5.1  
514 (Langmead & Salzberg, 2012) for MapR using –sensitive settings. Samtools version 1.8 (Li et  
515 al., 2009) was used to obtain, sort and index BAM files. For genome browser inspection as well  
516 as further analyses, bigwig files were generated by normalizing datasets to count-per-million  
517 CPM coverage tracks with *deepTools* version 3.1.1 (Ramírez et al., 2014) using --  
518 *normalizeUsing CPM* settings. Spearman's correlation scores were calculated using  
519 subpackages *multiBigwigSummary* and *plotCorrelation* as part of *deepTools*. Metaplots and  
520 genomic distribution heatmaps were generated with *computeMatrix*, *plotHeatmap* and  
521 *plotProfile* *deepTool* subpackages. MapR narrow and broad peaks were obtained using MACS2  
522 version 2.1.2 (Y. Zhang et al., 2008) with standard settings. Peak overlap and genomic  
523 distribution of peaks was determined using R package *ChIPseeker* (v1.26.2) (Yu et al., 2015)

524 and Homer (v4.11) Quantitative peak analysis was performed using GenomicRanges (v1.42.0)  
525 (Lawrence et al., 2013), csaw (v1.24.3) (Lun & Smyth, 2016) and edgeR (v3.13) (Robinson et  
526 al., 2010). R analysis was run in RStudio (v1.4.1106). Differential gene expression (DGE)  
527 analysis was performed using DESeq2 (Love et al., 2014). To increase the stringency of  
528 analysis, we generated shrunk fold change estimates within DESeq2 using the lfcShrink  
529 function (Zhu et al., 2019).

### 530 **Phototaxis**

531 Phototaxis assay was performed as previously described (Stegeman et al., 2018). Briefly, 30  
532 male flies were placed in a vial, tapped down and placed into the opening of the Maze  
533 apparatus. After letting them adjust to the darkness for 10 min, flies were given 30 seconds to  
534 choose between light and dark vial. Light preference index was then calculated as proportion of  
535 flies that chose light out of total number of flies.

### 536 **Graph plots**

537 Bar-plots were generated using the R package ggplot2 (v3.3.3), and scripts used for RNA-seq  
538 analysis and plot generation are available upon request.

539

### 540 **DATA AVAILABILITY**

541 RNA-seq expression data and MapR mapping data are accessible through Gene Expression  
542 Omnibus repository under series accession numbers GSE174488, GSE174491 and  
543 GSE174515, respectively.

### 544 **ACKNOWLEDGMENTS**

545 Fly stocks from the Bloomington Drosophila Stock Center and information from FlyBase were  
546 used in this study.

### 547 **CONFLICT OF INTEREST**

548 The authors declare that they have no competing interests.

### 549 **AUTHOR CONTRIBUTIONS**

550 J.J-L. performed all the NGS experiments and the bioinformatics analysis. N.A.L. and V.M.W.  
551 assisted with data analysis. A.N.E. and H.H. performed the slot blots and Western blots. S. E.  
552 performed the phototaxis assay. J.J-L. and H.H. wrote the manuscript with input from other  
553 authors. H.H. supervised the project and conceived the study.

#### 554 **ORCID**

555 Juan Jauregui-Lozano <https://orcid.org/0000-0001-6633-9152>

556 Alyssa N Easton <https://orcid.org/0000-0002-0972-3630>

557 Spencer E Escobedo <https://orcid.org/0000-0002-9026-9104>

558 Nadia A Lanman <https://orcid.org/0000-0002-1819-7070>

559 Vikki M. Weake <https://orcid.org/0000-0002-5933-9952>

560 Hana Hall <https://orcid.org/0000-0002-7544-4437>

561

#### 562 **HOW TO CITE THIS ARTICLE**

563 Jauregui-Lozano J, Easton AN, Escobedo SE, Lanman NA, Weake VM, Hall H. Proper control  
564 of R-loop homeostasis is required for maintenance of gene expression and neuronal function  
565 during aging

#### 566 **REFERENCES**

567 Aguilera, A., & García-Muse, T. (2012). R Loops: From Transcription Byproducts to Threats to

568 Genome Stability. *Molecular Cell*, 46(2), 115–124.

569 <https://doi.org/10.1016/j.molcel.2012.04.009>

570 Aguilera, A., & Gomez-Gonzalez, B. (2017). DNA-RNA hybrids: The risks of DNA breakage

571 during transcription. *Nat Struct Mol Biol*, 24(5), 439–443.

572 <https://doi.org/10.1038/nsmb.3395>

- 573 Akin, O., & Zipursky, S. L. (2016). Frazzled promotes growth cone attachment at the source of a  
574 Netrin gradient in the *Drosophila* visual system. *ELife*, *5*, e20762.  
575 <https://doi.org/10.7554/eLife.20762>
- 576 Allison, D. F., & Wang, G. G. (2019). R-loops: Formation, function, and relevance to cell stress.  
577 *Cell Stress*, *3*(2), 38–46. <https://doi.org/10.15698/cst2019.02.175>
- 578 Belotserkovskii, B. P., Liu, R., Tornaletti, S., Krasilnikova, M. M., Mirkin, S. M., & Hanawalt, P.  
579 C. (2010). Mechanisms and implications of transcription blockage by guanine-rich DNA  
580 sequences. *Proceedings of the National Academy of Sciences*, *107*(29), 12816–12821.  
581 <https://doi.org/10.1073/pnas.1007580107>
- 582 Boguslawski, S. J., Smith, D. E., Michalak, M. A., Mickelson, K. E., Yehle, C. O., Patterson, W.  
583 L., & Carrico, R. J. (1986). Characterization of monoclonal antibody to DNA · RNA and  
584 its application to immunodetection of hybrids. *Journal of Immunological Methods*, *89*(1),  
585 123–130. [https://doi.org/10.1016/0022-1759\(86\)90040-2](https://doi.org/10.1016/0022-1759(86)90040-2)
- 586 Bolger, A. M., Lohse, M., & Usadel, B. (2014). Trimmomatic: A flexible trimmer for Illumina  
587 sequence data. *Bioinformatics*, *30*(15), 2114–2120.  
588 <https://doi.org/10.1093/bioinformatics/btu170>
- 589 Bonnel, S., Mohand-Said, S., & Sahel, J.-A. (2003). The aging of the retina. *Experimental*  
590 *Gerontology*, *38*(8), 825–831. [https://doi.org/10.1016/S0531-5565\(03\)00093-7](https://doi.org/10.1016/S0531-5565(03)00093-7)
- 591 Boque-Sastre, R., Soler, M., Oliveira-Mateos, C., Portela, A., Moutinho, C., Sayols, S.,  
592 Villanueva, A., Esteller, M., & Guil, S. (2015). Head-to-head antisense transcription and  
593 R-loop formation promotes transcriptional activation. *Proceedings of the National*  
594 *Academy of Sciences*, *112*(18), 5785–5790.
- 595 Bosman, G. J., Engbersen, A., Vollaard, C. H., Bartholomeus, I. G., Pistorius, A. M., Renkawek,  
596 K., & De Grip, W. J. (1996). Implications of aging- and degeneration-related changes in  
597 anion exchange proteins for the maintenance of neuronal homeostasis. *Cellular and*  
598 *Molecular Biology (Noisy-Le-Grand, France)*, *42*(7), 905–918.



- 599 Bosman, G. J., Renkawek, K., Van Workum, F. P., Bartholomeus, I. G., Marini, S., & De Grip,  
600 W. J. (1998). Neuronal anion exchange proteins in Alzheimer's disease pathology.  
601 *Journal of Neural Transmission. Supplementum*, 54, 248–257.
- 602 Carbone, M. A., Yamamoto, A., Huang, W., Lyman, R. A., Meadors, T. B., Yamamoto, R.,  
603 Anholt, R. R. H., & Mackay, T. F. C. (2016). Genetic architecture of natural variation in  
604 visual senescence in *Drosophila*. *Proceedings of the National Academy of Sciences*,  
605 113(43), E6620–E6629. <https://doi.org/10.1073/pnas.1613833113>
- 606 Carthew, R. W. (2007). Pattern formation in the *Drosophila* eye. *Current Opinion in Genetics &*  
607 *Development*, 17(4), 309–313. <https://doi.org/10.1016/j.gde.2007.05.001>
- 608 Chan, Y. A., Aristizabal, M. J., Lu, P. Y. T., Luo, Z., Hamza, A., Kobor, M. S., Stirling, P. C., &  
609 Hieter, P. (2014). Genome-Wide Profiling of Yeast DNA:RNA Hybrid Prone Sites with  
610 DRIP-Chip. *PLOS Genetics*, 10(4), e1004288.  
611 <https://doi.org/10.1371/journal.pgen.1004288>
- 612 Chedin, F., & Benham, C. J. (2020). Emerging roles for R-loop structures in the management of  
613 topological stress. *The Journal of Biological Chemistry*, 295(14), 4684–4695.  
614 <https://doi.org/10.1074/jbc.REV119.006364>
- 615 Choe, K., & Clandinin, T. R. (2005). Thinking about Visual Behavior; Learning about  
616 Photoreceptor Function. In *Current Topics in Developmental Biology* (Vol. 69, pp. 187–  
617 213). Academic Press. [https://doi.org/10.1016/S0070-2153\(05\)69007-2](https://doi.org/10.1016/S0070-2153(05)69007-2)
- 618 Curcio, C. A. (2001). Photoreceptor topography in ageing and age-related maculopathy. *Eye*,  
619 15(3), 376–383. <https://doi.org/10.1038/eye.2001.140>
- 620 DePew, A. T., Aimino, M. A., & Mosca, T. J. (2019). The Tenets of Teneurin: Conserved  
621 Mechanisms Regulate Diverse Developmental Processes in the *Drosophila* Nervous  
622 System. *Frontiers in Neuroscience*, 13. <https://doi.org/10.3389/fnins.2019.00027>

- 623 Dobin, A., Davis, C. A., Schlesinger, F., Drenkow, J., Zaleski, C., Jha, S., Batut, P., Chaisson,  
624 M., & Gingeras, T. R. (2013). STAR: Ultrafast universal RNA-seq aligner. *Bioinformatics*,  
625 29(1), 15–21. <https://doi.org/10.1093/bioinformatics/bts635>
- 626 Drolet, M. (2006). Growth inhibition mediated by excess negative supercoiling: The interplay  
627 between transcription elongation, R-loop formation and DNA topology. *Molecular*  
628 *Microbiology*, 59(3), 723–730. <https://doi.org/10.1111/j.1365-2958.2005.05006.x>
- 629 Drolet, M., Bi, X., & Liu, L. F. (1994). Hypernegative supercoiling of the DNA template during  
630 transcription elongation in vitro. *J Biol Chem*, 269(3), 2068–2074.
- 631 Drolet, M., Phoenix, P., Menzel, R., Massé, E., Liu, L. F., & Crouch, R. J. (1995).  
632 Overexpression of RNase H partially complements the growth defect of an Escherichia  
633 coli delta topA mutant: R-loop formation is a major problem in the absence of DNA  
634 topoisomerase I. *Proceedings of the National Academy of Sciences*, 92(8), 3526–3530.  
635 <https://doi.org/10.1073/pnas.92.8.3526>
- 636 Fernandopulle, M. S., Lippincott-Schwartz, J., & Ward, M. E. (2021). RNA transport and local  
637 translation in neurodevelopmental and neurodegenerative disease. *Nature*  
638 *Neuroscience*, 1–11. <https://doi.org/10.1038/s41593-020-00785-2>
- 639 Gao, H., & Hollyfield, J. G. (1992). Aging of the human retina. Differential loss of neurons and  
640 retinal pigment epithelial cells. *Investigative Ophthalmology & Visual Science*, 33(1), 1–  
641 17.
- 642 Ginno, P. A., Lott, P. L., Christensen, H. C., Korf, I., & Chédin, F. (2012). R-Loop Formation Is a  
643 Distinctive Characteristic of Unmethylated Human CpG Island Promoters. *Molecular*  
644 *Cell*, 45(6), 814–825. <https://doi.org/10.1016/j.molcel.2012.01.017>
- 645 Gomez-Gonzalez, B., & Aguilera, A. (2019). Transcription-mediated replication hindrance: A  
646 major driver of genome instability. *Genes Dev*. <https://doi.org/10.1101/gad.324517.119>
- 647 Gómez-González, B., García-Rubio, M., Bermejo, R., Gaillard, H., Shirahige, K., Marín, A.,  
648 Foiani, M., & Aguilera, A. (2011). Genome-wide function of THO/TREX in active genes

649 prevents R-loop-dependent replication obstacles. *The EMBO Journal*, 30(15), 3106–  
650 3119. <https://doi.org/10.1038/emboj.2011.206>

651 Graw, J. (2017). From eyeless to neurological diseases. *Experimental Eye Research*, 156, 5–9.  
652 <https://doi.org/10.1016/j.exer.2015.11.006>

653 Groh, M., & Gromak, N. (2014). Out of Balance: R-loops in Human Disease. *PLOS Genetics*,  
654 10(9), e1004630. <https://doi.org/10.1371/journal.pgen.1004630>

655 Grotewiel, M. S., Martin, I., Bhandari, P., & Cook-Wiens, E. (2005). Functional senescence in  
656 *Drosophila melanogaster*. *Ageing Research Reviews*, 4(3), 372–397.  
657 <https://doi.org/10.1016/j.arr.2005.04.001>

658 Hall, H., Cooper, B. R., Qi, G., Wijeratne, A. B., Mosley, A. L., & Weake, V. M. (2021).  
659 Quantitative proteomic and metabolomic profiling reveals altered mitochondrial  
660 metabolism and folate biosynthesis pathways in the aging *Drosophila* eye. *BioRxiv*,  
661 2021.06.02.446766. <https://doi.org/10.1101/2021.06.02.446766>

662 Hall, H., Medina, P., Cooper, D. A., Escobedo, S. E., Rounds, J., Brennan, K. J., Vincent, C.,  
663 Miura, P., Doerge, R., & Weake, V. M. (2017). Transcriptome profiling of aging  
664 *Drosophila* photoreceptors reveals gene expression trends that correlate with visual  
665 senescence. *BMC Genomics*, 18(1), 894. <https://doi.org/10.1186/s12864-017-4304-3>

666 Hardie, R. C. (1985). Functional Organization of the Fly Retina. In H. Autrum, D. Ottoson, E. R.  
667 Perl, R. F. Schmidt, H. Shimazu, & W. D. Willis (Eds.), *Progress in Sensory Physiology*  
668 (pp. 1–79). Springer. [https://doi.org/10.1007/978-3-642-70408-6\\_1](https://doi.org/10.1007/978-3-642-70408-6_1)

669 Hartmann, C., Landgraf, M., Bate, M., & Jäckle, H. (1997). Krüppel target gene knockout  
670 participates in the proper innervation of a specific set of *Drosophila* larval muscles. *The*  
671 *EMBO Journal*, 16(17), 5299–5309. <https://doi.org/10.1093/emboj/16.17.5299>

672 Jackson, G. R., Owsley, C., & Curcio, C. A. (2002). Photoreceptor degeneration and dysfunction  
673 in aging and age-related maculopathy. *Ageing Research Reviews*, 1(3), 381–396.  
674 [https://doi.org/10.1016/S1568-1637\(02\)00007-7](https://doi.org/10.1016/S1568-1637(02)00007-7)

- 675 Jauregui-Lozano, J., Bakhle, K., & Weake, V. M. (2021a). In vivo tissue-specific chromatin  
676 profiling in *Drosophila melanogaster* using GFP-tagged nuclei. *Genetics*, *iyab079*.  
677 <https://doi.org/10.1093/genetics/iyab079>
- 678 Jauregui-Lozano, J., Bakhle, K., & Weake, V. M. (2021b). In vivo tissue-specific chromatin  
679 profiling in *Drosophila melanogaster* using GFP-tagged nuclei. *Genetics*, *iyab079*.  
680 <https://doi.org/10.1093/genetics/iyab079>
- 681 Joo, Y., Xue, Y., Wang, Y., McDevitt, R. A., Sah, N., Bossi, S., Su, S., Lee, S. K., Peng, W., Xie,  
682 A., Zhang, Y., Ding, Y., Ku, W. L., Ghosh, S., Fishbein, K., Shen, W., Spencer, R.,  
683 Becker, K., Zhao, K., ... Wang, W. (2020). Topoisomerase 3 $\beta$  knockout mice show  
684 transcriptional and behavioural impairments associated with neurogenesis and synaptic  
685 plasticity. *Nature Communications*, *11*(1), 3143. [https://doi.org/10.1038/s41467-020-](https://doi.org/10.1038/s41467-020-16884-4)  
686 [16884-4](https://doi.org/10.1038/s41467-020-16884-4)
- 687 Joshi, R. S., Piña, B., & Roca, J. (2012). Topoisomerase II is required for the production of long  
688 Pol II gene transcripts in yeast. *Nucleic Acids Research*, *40*(16), 7907–7915.  
689 <https://doi.org/10.1093/nar/gks626>
- 690 Keszthelyi, A., Minchell, N. E., & Baxter, J. (2016). The Causes and Consequences of  
691 Topological Stress during DNA Replication. *Genes*, *7*(12).  
692 <https://doi.org/10.3390/genes7120134>
- 693 King, I. F., Yandava, C. N., Mabb, A. M., Hsiao, J. S., Huang, H.-S., Pearson, B. L., Calabrese,  
694 J. M., Starmer, J., Parker, J. S., Magnuson, T., Chamberlain, S. J., Philpot, B. D., &  
695 Zylka, M. J. (2013). Topoisomerases facilitate transcription of long genes linked to  
696 autism. *Nature*, *501*, 58. <https://doi.org/10.1038/nature12504>
- 697 Kwan, K. Y., & Wang, J. C. (2001). Mice lacking DNA topoisomerase III $\beta$  develop to maturity but  
698 show a reduced mean lifespan. *Proceedings of the National Academy of Sciences*,  
699 *98*(10), 5717–5721. <https://doi.org/10.1073/pnas.101132498>

700 Landt, S. G., Marinov, G. K., Kundaje, A., Kheradpour, P., Pauli, F., Batzoglou, S., Bernstein, B.  
701 E., Bickel, P., Brown, J. B., Cayting, P., Chen, Y., DeSalvo, G., Epstein, C., Fisher-Aylor,  
702 K. I., Euskirchen, G., Gerstein, M., Gertz, J., Hartemink, A. J., Hoffman, M. M., ...  
703 Snyder, M. (2012). CHIP-seq guidelines and practices of the ENCODE and  
704 modENCODE consortia. *Genome Research*, 22(9), 1813–1831.  
705 <https://doi.org/10.1101/gr.136184.111>

706 Langmead, B., & Salzberg, S. L. (2012). Fast gapped-read alignment with Bowtie 2. *Nature*  
707 *Methods*, 9(4), 357–359. <https://doi.org/10.1038/nmeth.1923>

708 Lawrence, M., Huber, W., Pagès, H., Aboyoun, P., Carlson, M., Gentleman, R., Morgan, M. T.,  
709 & Carey, V. J. (2013). Software for Computing and Annotating Genomic Ranges. *PLOS*  
710 *Computational Biology*, 9(8), e1003118. <https://doi.org/10.1371/journal.pcbi.1003118>

711 *LB (Luria-Bertani) liquid medium*. (n.d.). Retrieved March 16, 2021, from  
712 [http://cshprotocols.cshlp.org/content/2006/1/pdb.rec8141.full?text\\_only=](http://cshprotocols.cshlp.org/content/2006/1/pdb.rec8141.full?text_only=)

713 Lewis, E. (1960). A new standard food medium. *Drosophila Information Service*, 34(117), 1–55.

714 Li, H., Handsaker, B., Wysoker, A., Fennell, T., Ruan, J., Homer, N., Marth, G., Abecasis, G., &  
715 Durbin, R. (2009). The Sequence Alignment/Map format and SAMtools. *Bioinformatics*,  
716 25(16), 2078–2079. <https://doi.org/10.1093/bioinformatics/btp352>

717 Liu, L. F., & Wang, J. C. (1987). Supercoiling of the DNA template during transcription.  
718 *Proceedings of the National Academy of Sciences*, 84(20), 7024–7027.

719 López-Otín, C., Blasco, M. A., Partridge, L., Serrano, M., & Kroemer, G. (2013a). The Hallmarks  
720 of Aging. *Cell*, 153(6), 1194–1217. <https://doi.org/10.1016/j.cell.2013.05.039>

721 López-Otín, C., Blasco, M. A., Partridge, L., Serrano, M., & Kroemer, G. (2013b). The Hallmarks  
722 of Aging. *Cell*, 153(6), 1194–1217. <https://doi.org/10.1016/j.cell.2013.05.039>

723 Love, M. I., Huber, W., & Anders, S. (2014). Moderated estimation of fold change and  
724 dispersion for RNA-seq data with DESeq2. *Genome Biology*, 15(12), 550.  
725 <https://doi.org/10.1186/s13059-014-0550-8>

- 726 Lun, A. T. L., & Smyth, G. K. (2016). csaw: A Bioconductor package for differential binding  
727 analysis of ChIP-seq data using sliding windows. *Nucleic Acids Research*, *44*(5), e45.  
728 <https://doi.org/10.1093/nar/gkv1191>
- 729 Ma, J., & Weake, V. M. (2014). Affinity-based Isolation of Tagged Nuclei from Drosophila  
730 Tissues for Gene Expression Analysis. *JoVE (Journal of Visualized Experiments)*, *85*,  
731 e51418. <https://doi.org/10.3791/51418>
- 732 Mackay, R. P., Xu, Q., & Weinberger, P. M. (2020). R-Loop Physiology and Pathology: A Brief  
733 Review. *DNA and Cell Biology*, *39*(11), 1914–1925.  
734 <https://doi.org/10.1089/dna.2020.5906>
- 735 Manzo, S. G., Hartono, S. R., Sanz, L. A., Marinello, J., De Biasi, S., Cossarizza, A., Capranico,  
736 G., & Chedin, F. (2018). DNA Topoisomerase I differentially modulates R-loops across  
737 the human genome. *Genome Biology*, *19*(1), 100. [https://doi.org/10.1186/s13059-018-](https://doi.org/10.1186/s13059-018-1478-1)  
738 [1478-1](https://doi.org/10.1186/s13059-018-1478-1)
- 739 McKinnon, P. J. (2016). Topoisomerases and the regulation of neural function. *Nature Reviews*.  
740 *Neuroscience*, *17*(11), 673–679. <https://doi.org/10.1038/nrn.2016.101>
- 741 Meers, M. P., Bryson, T. D., Henikoff, J. G., & Henikoff, S. (2019). Improved CUT&RUN  
742 chromatin profiling tools. *ELife*, *8*, e46314. <https://doi.org/10.7554/eLife.46314>
- 743 Morikawa, R. K., Kanamori, T., Yasunaga, K., & Emoto, K. (2011). Different levels of the  
744 Tripartite motif protein, Anomalies in sensory axon patterning (Asap), regulate distinct  
745 axonal projections of Drosophila sensory neurons. *Proceedings of the National Academy*  
746 *of Sciences*, *108*(48), 19389–19394.
- 747 Mosca, T. J., Hong, W., Dani, V. S., Favaloro, V., & Luo, L. (2012). Trans-synaptic Teneurin  
748 signalling in neuromuscular synapse organization and target choice. *Nature*, *484*(7393),  
749 237–241. <https://doi.org/10.1038/nature10923>

- 750 Niehrs, C., & Luke, B. (2020). Regulatory R-loops as facilitators of gene expression and  
751 genome stability. *Nature Reviews Molecular Cell Biology*, 1–12.  
752 <https://doi.org/10.1038/s41580-019-0206-3>
- 753 Panda-Jonas, S., Jonas, J. B., & Jakobczyk-Zmija, M. (1995). Retinal Photoreceptor Density  
754 Decreases with Age. *Ophthalmology*, 102(12), 1853–1859.  
755 [https://doi.org/10.1016/S0161-6420\(95\)30784-1](https://doi.org/10.1016/S0161-6420(95)30784-1)
- 756 Parapuram, S. K., Cojocaru, R. I., Chang, J. R., Khanna, R., Brooks, M., Othman, M., Zarepari,  
757 S., Khan, N. W., Gotoh, N., Cogliati, T., & Swaroop, A. (2010). Distinct signature of  
758 altered homeostasis in aging rod photoreceptors: Implications for retinal diseases. *PLoS*  
759 *One*, 5(11), e13885. <https://doi.org/10.1371/journal.pone.0013885>
- 760 Partridge, L., & Mangel, M. (1999). Messages from mortality: The evolution of death rates in the  
761 old. *Trends in Ecology & Evolution*, 14(11), 438–442. [https://doi.org/10.1016/S0169-](https://doi.org/10.1016/S0169-5347(99)01646-8)  
762 [5347\(99\)01646-8](https://doi.org/10.1016/S0169-5347(99)01646-8)
- 763 Pommier, Y., Sun, Y., Huang, S. N., & Nitiss, J. L. (2016). Roles of eukaryotic topoisomerases  
764 in transcription, replication and genomic stability. *Nature Reviews Molecular Cell*  
765 *Biology*, 17, 703. <https://doi.org/10.1038/nrm.2016.111>
- 766 Ramírez, F., Dünder, F., Diehl, S., Grüning, B. A., & Manke, T. (2014). deepTools: A flexible  
767 platform for exploring deep-sequencing data. *Nucleic Acids Research*, 42(Web Server  
768 issue), W187–W191. <https://doi.org/10.1093/nar/gku365>
- 769 Rauser, C. L., Abdel-Aal, Y., Shieh, J. A., Suen, C. W., Mueller, L. D., & Rose, M. R. (2005).  
770 Lifelong heterogeneity in fecundity is insufficient to explain late-life fecundity plateaus in  
771 *Drosophila melanogaster*. *Experimental Gerontology*, 40(8), 660–670.  
772 <https://doi.org/10.1016/j.exger.2005.06.006>
- 773 Robinson, M. D., McCarthy, D. J., & Smyth, G. K. (2010). edgeR: A Bioconductor package for  
774 differential expression analysis of digital gene expression data. *Bioinformatics*, 26(1),  
775 139–140. <https://doi.org/10.1093/bioinformatics/btp616>



- 776 Sanz, L. A., Hartono, S. R., Lim, Y. W., Steyaert, S., Rajpurkar, A., Ginno, P. A., Xu, X., &  
777 Chédin, F. (2016a). Prevalent, Dynamic, and Conserved R-Loop Structures Associate  
778 with Specific Epigenomic Signatures in Mammals. *Molecular Cell*, 63(1), 167–178.  
779 <https://doi.org/10.1016/j.molcel.2016.05.032>
- 780 Sanz, L. A., Hartono, S. R., Lim, Y. W., Steyaert, S., Rajpurkar, A., Ginno, P. A., Xu, X., &  
781 Chédin, F. (2016b). Prevalent, Dynamic, and Conserved R-Loop Structures Associate  
782 with Specific Epigenomic Signatures in Mammals. *Molecular Cell*, 63(1), 167–178.  
783 <https://doi.org/10.1016/j.molcel.2016.05.032>
- 784 Simon, A. F., Liang, D. T., & Krantz, D. E. (2006). Differential decline in behavioral performance  
785 of *Drosophila melanogaster* with age. *Mechanisms of Ageing and Development*, 127(7),  
786 647–651. <https://doi.org/10.1016/j.mad.2006.02.006>
- 787 Skourti-Stathaki, K., Kamieniarz-Gdula, K., & Proudfoot, N. J. (2014). R-loops induce repressive  
788 chromatin marks over mammalian gene terminators. *Nature*, 516(7531), 436–439.  
789 <https://doi.org/10.1038/nature13787>
- 790 Skourti-Stathaki, K., Proudfoot, N. J., & Gromak, N. (2011). Human Senataxin Resolves  
791 RNA/DNA Hybrids Formed at Transcriptional Pause Sites to Promote Xrn2-Dependent  
792 Termination. *Molecular Cell*, 42(6), 794–805.  
793 <https://doi.org/10.1016/j.molcel.2011.04.026>
- 794 Stegeman, R., Hall, H., Escobedo, S. E., Chang, H. C., & Weake, V. M. (2018). Proper splicing  
795 contributes to visual function in the aging *Drosophila* eye. *Aging Cell*, 17(5), e12817.  
796 <https://doi.org/10.1111/accel.12817>
- 797 Stoeger, T., Grant, R. A., McQuattie-Pimentel, A. C., Anekalla, K., Liu, S. S., Tejedor-Navarro,  
798 H., Singer, B. D., Abdala-Valencia, H., Schwake, M., Tetreault, M.-P., Perlman, H.,  
799 Balch, W. E., Chandel, N., Ridge, K., Sznajder, J. I., Morimoto, R. I., Misharin, A. V.,  
800 Budinger, G. R. S., & Amaral, L. A. N. (2019). Aging is associated with a systemic  
801 length-driven transcriptome imbalance. *BioRxiv*, 691154. <https://doi.org/10.1101/691154>



- 802 Sun, M., & Xie, W. (2012). Cell adhesion molecules in Drosophila synapse development and  
803 function. *Science China Life Sciences*, 55(1), 20–26. [https://doi.org/10.1007/s11427-](https://doi.org/10.1007/s11427-012-4273-3)  
804 [012-4273-3](https://doi.org/10.1007/s11427-012-4273-3)
- 805 Villarreal, O. D., Mersaoui, S. Y., Yu, Z., Masson, J.-Y., & Richard, S. (2020). Genome-wide R-  
806 loop analysis defines unique roles for DDX5, XRN2, and PRMT5 in DNA/RNA hybrid  
807 resolution. *Life Science Alliance*, 3(10). <https://doi.org/10.26508/lsa.202000762>
- 808 Wahba, L., Costantino, L., Tan, F. J., Zimmer, A., & Koshland, D. (2016). S1-DRIP-seq  
809 identifies high expression and polyA tracts as major contributors to R-loop formation.  
810 *Genes & Development*, 30(11), 1327–1338. <https://doi.org/10.1101/gad.280834.116>
- 811 Wang, J. C. (2002). Cellular roles of DNA topoisomerases: A molecular perspective. *Nature*  
812 *Reviews Molecular Cell Biology*, 3(6), 430–440. <https://doi.org/10.1038/nrm831>
- 813 Weale, R. (1998). The Eye within the Framework of Human Senescence: Biological Decline and  
814 Morbidity. *Ophthalmic Research*, 30(2), 59–73. <https://doi.org/10.1159/000055456>
- 815 Xu, D., Shen, W., Guo, R., Xue, Y., Peng, W., Sima, J., Yang, J., Sharov, A., Srikantan, S.,  
816 Yang, J., Fox, D., Qian, Y., Martindale, J. L., Piao, Y., Machamer, J., Joshi, S. R.,  
817 Mohanty, S., Shaw, A. C., Lloyd, T. E., ... Wang, W. (2013). Top3 $\beta$  is an RNA  
818 topoisomerase that works with Fragile X syndrome protein to promote synapse  
819 formation. *Nature Neuroscience*, 16(9), 1238–1247. <https://doi.org/10.1038/nn.3479>
- 820 Yamamoto, D., Fujitani, K., Usui, K., Ito, H., & Nakano, Y. (1998). From behavior to  
821 development: Genes for sexual behavior define the neuronal sexual switch in  
822 Drosophila. *Mechanisms of Development*, 73(2), 135–146.  
823 [https://doi.org/10.1016/S0925-4773\(98\)00042-2](https://doi.org/10.1016/S0925-4773(98)00042-2)
- 824 Yan, Q., & Sarma, K. (2020a). MapR: A Method for Identifying Native R-Loops Genome Wide.  
825 *Current Protocols in Molecular Biology*, 130(1), e113. <https://doi.org/10.1002/cpmb.113>
- 826 Yan, Q., & Sarma, K. (2020b). MapR: A Method for Identifying Native R-Loops Genome Wide.  
827 *Current Protocols in Molecular Biology*, 130(1), e113. <https://doi.org/10.1002/cpmb.113>

- 828 Yan, Q., Shields, E. J., Bonasio, R., & Sarma, K. (2019a). Mapping Native R-Loops Genome-  
829 wide Using a Targeted Nuclease Approach. *Cell Reports*, 29(5), 1369-1380.e5.  
830 <https://doi.org/10.1016/j.celrep.2019.09.052>
- 831 Yan, Q., Shields, E. J., Bonasio, R., & Sarma, K. (2019b). Mapping Native R-Loops Genome-  
832 wide Using a Targeted Nuclease Approach. *Cell Reports*, 29(5), 1369-1380.e5.  
833 <https://doi.org/10.1016/j.celrep.2019.09.052>
- 834 Yang, X., Li, W., Prescott, E. D., Burden, S. J., & Wang, J. C. (2000). DNA Topoisomerase II $\beta$   
835 and Neural Development. *Science*, 287(5450), 131–134.  
836 <https://doi.org/10.1126/science.287.5450.131>
- 837 Yang, Y., McBride, K. M., Hensley, S., Lu, Y., Chedin, F., & Bedford, M. T. (2014). Arginine  
838 Methylation Facilitates the Recruitment of TOP3 $\beta$  to Chromatin to Prevent R Loop  
839 Accumulation. *Molecular Cell*, 53(3), 484–497.  
840 <https://doi.org/10.1016/j.molcel.2014.01.011>
- 841 Yu, G., Wang, L.-G., & He, Q.-Y. (2015). ChIPseeker: An R/Bioconductor package for ChIP  
842 peak annotation, comparison and visualization. *Bioinformatics*, 31(14), 2382–2383.  
843 <https://doi.org/10.1093/bioinformatics/btv145>
- 844 Zhang, T., Wallis, M., Petrovic, V., Challis, J., Kalitsis, P., & Hudson, D. F. (2020). Loss of  
845 TOP3 $\beta$  leads to increased R-loop formation and genome instability. *Open Biology*, 9(12),  
846 190222. <https://doi.org/10.1098/rsob.190222>
- 847 Zhang, Y., Liu, T., Meyer, C. A., Eeckhoute, J., Johnson, D. S., Bernstein, B. E., Nusbaum, C.,  
848 Myers, R. M., Brown, M., Li, W., & Liu, X. S. (2008). Model-based analysis of ChIP-Seq  
849 (MACS). *Genome Biology*, 9(9), R137. <https://doi.org/10.1186/gb-2008-9-9-r137>
- 850 Zhu, A., Ibrahim, J. G., & Love, M. I. (2019). Heavy-tailed prior distributions for sequence count  
851 data: Removing the noise and preserving large differences. *Bioinformatics*, 35(12),  
852 2084–2092. <https://doi.org/10.1093/bioinformatics/bty895>
- 853

854 **5 FIGURE LEGENDS**

855 **Table 1.** Summary of uniquely mapped fragments for Aging MapR samples to *Drosophila*  
856 *melanogaster* dm6 genome.

857

858 **Figure 1. Aging photoreceptor neurons show increased global levels of R-loops that correlate**  
859 **with loss of function and precede age-associated retinal degeneration**

860 (a) Experimental scheme to detect global levels of R-loops in aging photoreceptor neurons

861 (b) Top: Schematic diagram of the cellular localization of the GFP<sup>KASH</sup> protein. Dark blue lines  
862 represent each lipid layer from the nuclear membrane. Bottom: Schematic diagram of the  
863 ommatidia, or structural subunit in the *Drosophila* compound eye. Each ommatidia is composed  
864 of 8 photoreceptor neurons, labeled R1 to R8. Outer photoreceptors express the *ninaE* (Rh1)  
865 gene.

866 (c) Slot blot analysis of R-loop levels from photoreceptor nuclei at day 10, day 30 and day 50  
867 post-eclosion treated with (right) or without (left) RNase H1. Slot blots were performed using  
868 S9.6 antibody (top) and ssDNA for loading control (bottom).

869 (d) Quantification of S9.6 slot blot signal in aging PRs. S9.6 signal at day 30 and day 50 is  
870 normalized to day 10 signal. Values above 1 represent increase signal relative to Day 10. Mean  
871 + Standard Deviation (SD), (n=2).

872 **Figure 2. Mapping genome-wide distribution of R-loops in aging PR neurons**

873 (a) Schematic diagram of R-loop mapping technique used in this study (MapR). Immuno-  
874 enriched nuclei are incubated with  $\Delta$ RNaseH-MNase ( $\Delta$ RH-MNase), where  $\Delta$ RH binds to R-  
875 loops. Enzymatic activation of MNase results in cleavage of surrounding DNA and subsequent  
876 R-loop enriched DNA release, which is purified and used for sequencing library preparation.

- 877 (b) Spearman correlation heatmap of MapR read distribution over 1000-bp binned genome.  
878 Scores between 0 and 1 shown in each box correspond to Spearman's rank score.
- 879 (c) Principal component analysis (PCA) of Aging MapR samples based on read distribution over  
880 1000-bp binned genome.
- 881 (d) Genomic distribution of MapR peaks during aging. Promoter is defined as the region -2/+2  
882 kb around TSS defined by RefSeq.
- 883 (e) Fraction of Reads in Peaks (FRiP) scores for Aging MapR samples. Scores above 0.3 are  
884 commonly associated with high quality ChIP-seq datasets as defined by modENCODE  
885 standards.
- 886 **Figure 3. Age-associated changes in R-loop levels in PR neurons are highly dynamic**
- 887 (a) Metaplot of CPM-normalized MapR signal over gene bodies for all genes across timepoints.  
888 Signal is an average obtained from three independent biological replicates per timepoint. TSS  
889 indicates Transcription Start Site and TES indicates Transcription Termination Site.
- 890 (b) MapR fold change metaplot (top) and heatmap (bottom) for early aging (left) and late aging  
891 (right).
- 892 (c) Genomic browser inspection of six genes that have either gain (left) or loss (right) of R-loops  
893 during aging.
- 894 (d) Metaplot of MapR signal around called peaks during aging.
- 895 (e) Boxplot of genomic coverage as defined by the total sum of peak width obtained at each  
896 time point. Peaks that mapped to scaffold or non-defined chromosomes were excluded from  
897 analysis. We used Wilcoxon Rank-Sum test to compare pair-wise differences in the distribution  
898 of genomic coverage amongst ages, (n=3).

899 (f) R-loop signal fold change of quantified peaks in early and late aging as defined by differential  
900 occupancy quantified by CPM using csaw and DESeq2. Peaks were annotated to genomic  
901 features using Homer and divided based on annotation.

902 **Figure 4. Age-related R-loop accumulation is associated with specific genomic features and**  
903 **decreased expression of long and highly expressed genes**

904 (a) Heatmap showing log<sub>2</sub> ratios of MapR signal around the TSS (left) or TTS (right), comparing  
905 day 50 to day 10. Genes are ranked based on their fold change value and divided in four groups  
906 based on their position on the heatmap.

907 (b) Boxplot analysis of GC content, gene length and expression levels for each group of genes  
908 divided in four groups based on the MapR fold changes around TSS. P-value is obtained using  
909 Wilcoxon test.

910 (c) as in (b) but for MapR fold changes around the TTS. P-value is obtained using Wilcoxon test.

911 (d) Volcano plot representing Differentially expressed genes between Day 50 and D10.  
912 Differentially expressed genes are obtained using DESeq2 (adjusted p-value < 0.05, |FC|>1.5).

913 (e) Receiver operating characteristic (ROC) curves for genomic features (GC content, Gene  
914 Length and Expression levels) that identify age-regulated genes. AUC stands for Area Under  
915 the Curve. Red and blue lines correspond to genes that are up- and down-regulated with age,  
916 respectively

917 **Figure 5. Loss of *Drosophila* Top3β leads to increase in R-loop levels**

918 (a) Slot blot analysis of R-loop levels from 3<sup>rd</sup> instar larvae ubiquitously expressing a siRNA  
919 against mCherry (siControl) or against Top3β (siTop3β). Samples are treated with (right) or  
920 without (left) RNAse H1. Slot blots were performed using S9.6 antibody (top) and ssDNA for  
921 loading control (bottom).

922 (b) Quantification of S9.6 slot blot of siTop3 $\beta$  and siControl 3<sup>rd</sup> instar larvae. S9.6 signal is  
923 normalized to ssDNA slot blot signal, (n=2).

924 (c) Bar plots of quantitative PCR validating the downregulation of Top3 $\beta$  upon ubiquitous  
925 expression of an siRNA (BDSC#31480). P-value is obtained using T-test, (n=3).

926 (d) Box plots showing the light preference indices (positive phototaxis) for  
927 Rh1>GFP<sup>KASH</sup>, mCherry-RNAi (referred as siControl) or Rh1>GFP<sup>KASH</sup>, Top3 $\beta$ -RNAi (siTop3 $\beta$ ) at  
928 day 10 and 30 (6 biological replicates for each time point or RNAi, total 24 experiments; 27 - 33  
929 male flies/experiment). P value obtained using Wilcoxon test.

930 (e) Optic neutralization of siControl and siTop3 $\beta$  at day 10 and 30 post eclosion. Retinal  
931 degeneration (RD) scores were obtained by blindly quantifying 5 biological replicates. Score of  
932 0% means there was no observable loss of rhabdomere or ommatidia.

933 **Figure 6. Top3 $\beta$  regulates expression of a subset of long genes associated with neuronal**  
934 **function in photoreceptor neurons**

935 (a) Volcano plot representing differentially expressed genes (DEGs) between siTop3 $\beta$  and  
936 siControl-expressing photoreceptors at day 30 post eclosion. DEGs obtained using DESeq2  
937 (adjusted p-value < 0.05, |FC|>1.5). Size of each point reflect the gene length of the whole gene  
938 as defined as most upstream TSS and most downstream TTS.

939 (b) Box plots showing the gene length (as log<sub>2</sub>-transformed bp) for genes identified as down-,  
940 up- or not regulated using DESeq2 in siTop3 $\beta$  photoreceptors relative to siControl (adjusted p-  
941 value < 0.05, |FC|>1.5). P value obtained using Wilcoxon test.

942 (c) Gene concept network analysis (Cnetplot) of genes downregulated in siTop3 $\beta$   
943 photoreceptors relative to siControl. Gene length in kilobases is shown next to each gene.

944 (d) Box plots showing the gene length (as  $\log_2$ -transformed bp) for genes identified as down-,  
945 up- or not regulated using DESeq2 in day 50 photoreceptors relative to day 10. P value is  
946 obtained using Wilcoxon test.

947 (e) Scatter plot comparison of genes that change expression with age and genes that change  
948 upon downregulation of Top3 $\beta$ . Red and blue represent genes that are up- or down-regulated  
949 with age, respectively. Light blue box represents genes that are downregulated in siTop3 $\beta$   
950 photoreceptors relative to siControl.

951 (f) Heatmap showing  $\log_2$  ratios of aging MapR fold change signal over the gene body for genes  
952 that were transcriptionally dysregulated upon downregulation of Top3 $\beta$ , or “Top3 $\beta$ -dependent  
953 genes”. Genes are ranked based on their fold change value.

954 (g) Comparison of Top3 $\beta$  protein levels in aging eyes from Rh1>GFP<sup>KASH</sup> flies, as measured by  
955 normalized mass spectrometry abundance. Proteomic samples were prepared from 10- and 40-  
956 day old flies, (n=4). Raw data taken from (Hall et al., 2021).

## 957 **SUPPLEMENTAL FIGURES**

### 958 **Supplemental Figure 1**

959 (a) Aging optic neutralization time course of Rh1>GFP<sup>KASH</sup> and Rh1>mCherry-RNAi,  
960 Rh1>GFP<sup>KASH</sup>, male flies at day 10, 20, 30, 40 and 50 post eclosion. Retinal degeneration (RD)  
961 scores were obtained by blindly quantifying 5 biological replicates.

### 962 **Supplemental Figure 2**

963 (a) Metaplot of CPM-normalized MapR signal over gene bodies for all genes comparing the  
964 standard and modified MapR protocol when protocol is performed using *Drosophila*  
965 photoreceptor nuclei.

966 (b) Metaplot of CPM-normalized MapR signal over gene bodies in HEK293T cells (Data from  
967 original MapR paper (Yan & Sarma, 2020b)).

968 (c) Metaplot (top) and heatmap (bottom) of CPM-normalized MapR signal over gene bodies for  
969 samples that were treated with (right) or without (left) RNAseH1. For heatmap, genes are  
970 ranked based on their MapR signal.

971 (d) Genome browser inspection (IGV) of a selected genomic region of samples used for  
972 metaplots and heatmaps in Figure S2C. Signal is normalized to CPM and both lanes are shown  
973 in the same scale.

974 (e) Metaplot of CPM-normalized MapR signal over gene bodies of genes with higher (dark blue)  
975 or lower (green) transcript-per-million (TPM) values of 7, obtained with RNA-seq.

976 (f) Number of MapR peaks called using MACS2 based on sequencing depth. Bam file is down-  
977 sampled to 1, 5, 10, 20, 40 and 50 million mapped fragments and peaks are called.

### 978 **Supplemental Figure 3.**

979 (a) Violin plots showing the peak width distribution for each timepoint. Black line is placed at the  
980 calculated mean for peak width at day 10.

981 (c) Brand-Altman (MA) plot showing the correlation between  $\log_2$ -transformed R-loop signal fold  
982 change and peak occupancy, as defined by counts per million (CPM) for early (top) and late  
983 (bottom) aging. Differential peaks are defined as having a False Discovery Rate (FDR) lower  
984 than 5%, and fold change greater than 1.2.

985



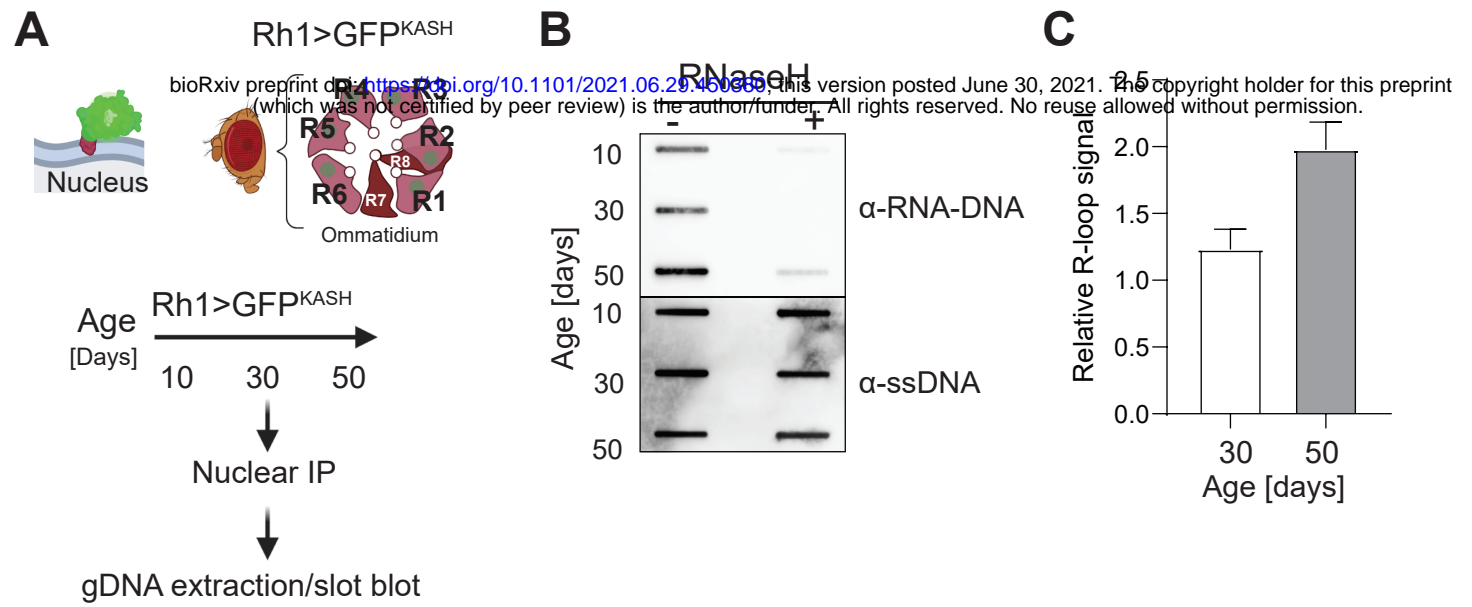

**A**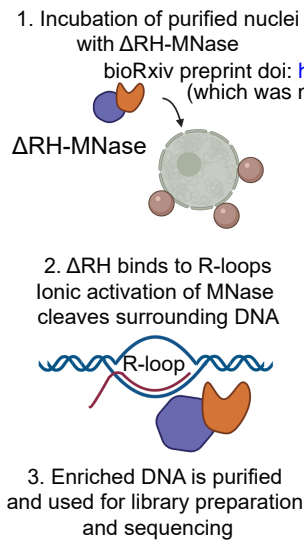**B**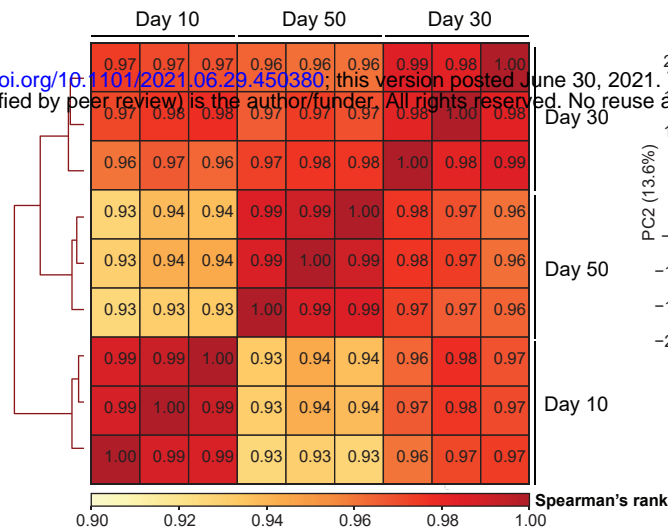**C**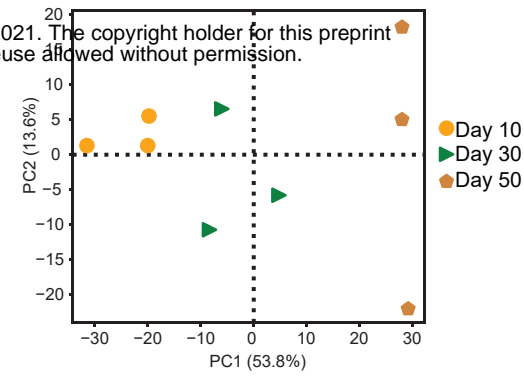**D**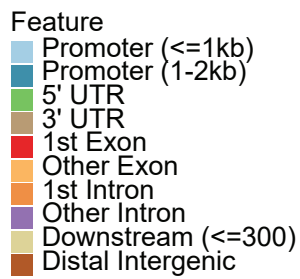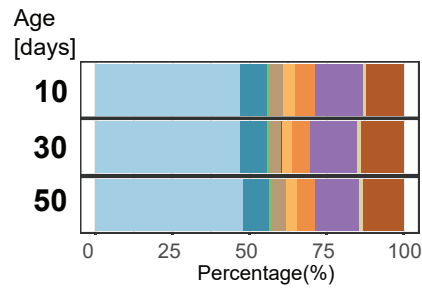**E**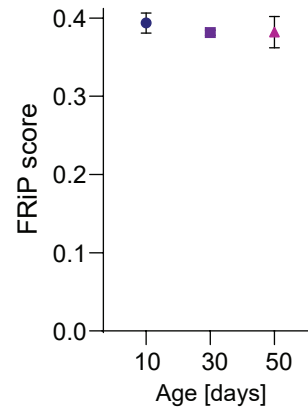

**A**

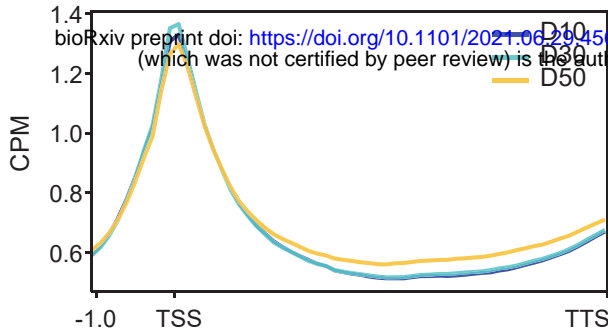

**C**

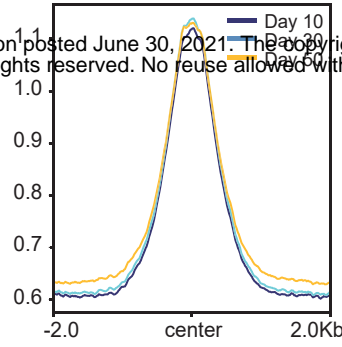

**D**

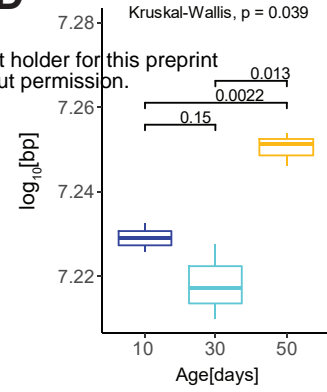

**B**

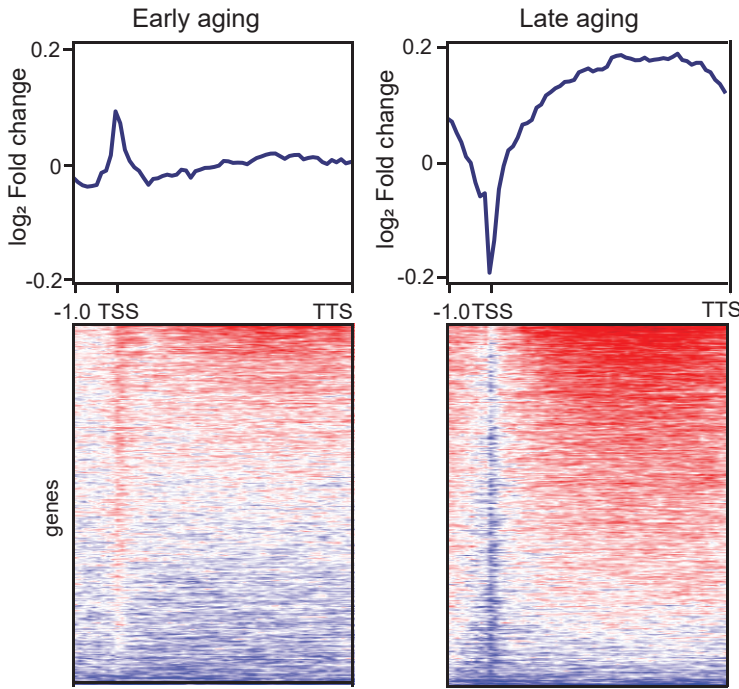

$\log_2$  Fold Change ( $CPM^{young}/CPM^{old}$ )  
 Loss ← → Gain  
 -0.2      0      0.2

**E**

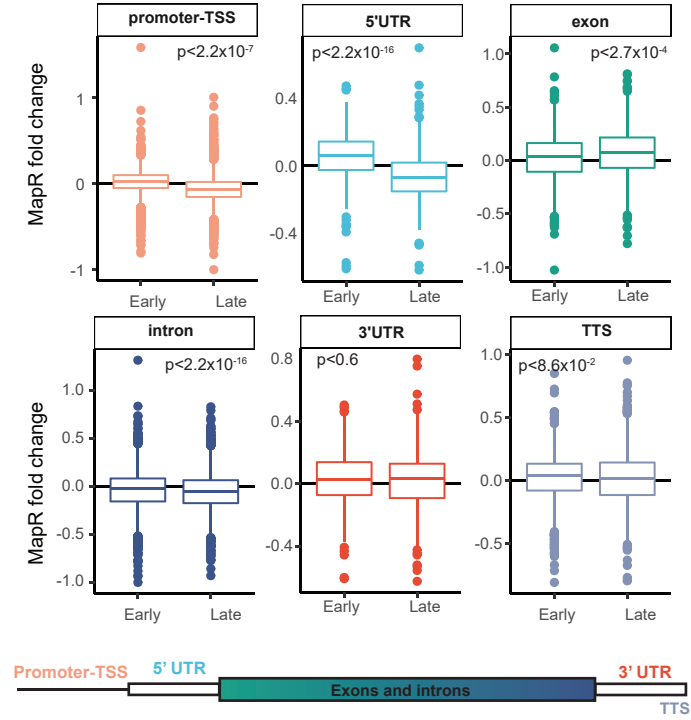

| Gene region  | Early aging | Late aging |
|--------------|-------------|------------|
| Promoter-TSS | no change   | down       |
| 5' UTR       | up          | down       |
| exon         | up          | up         |
| intron       | down        | down       |
| 3' UTR       | no change   | no change  |
| TTS          | up          | no change  |

**A**

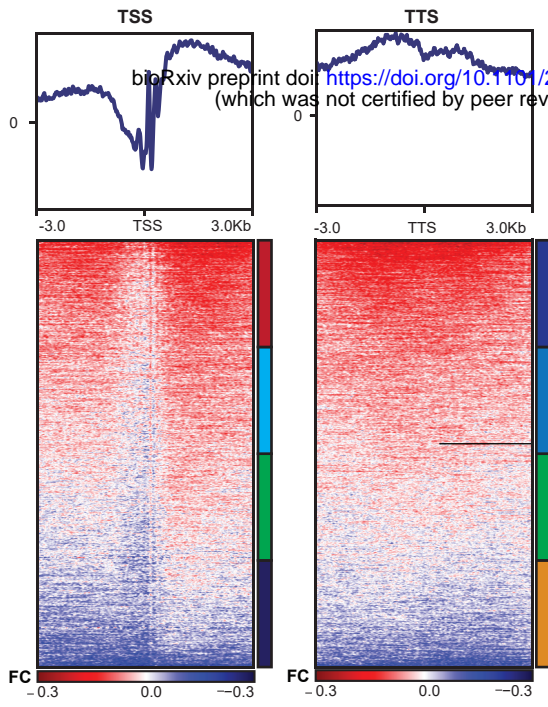

**B**

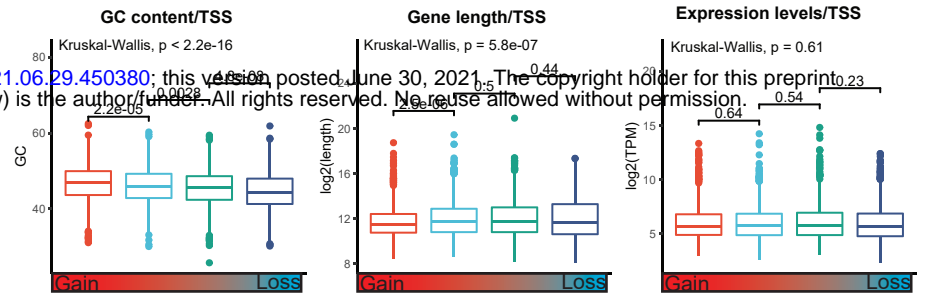

**C**

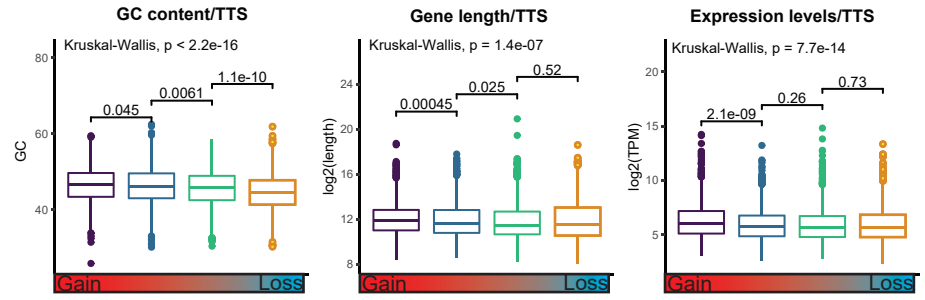

**D**

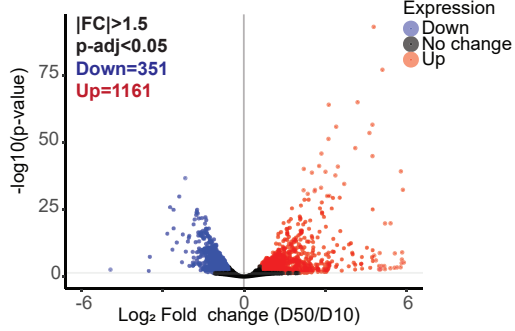

**E**

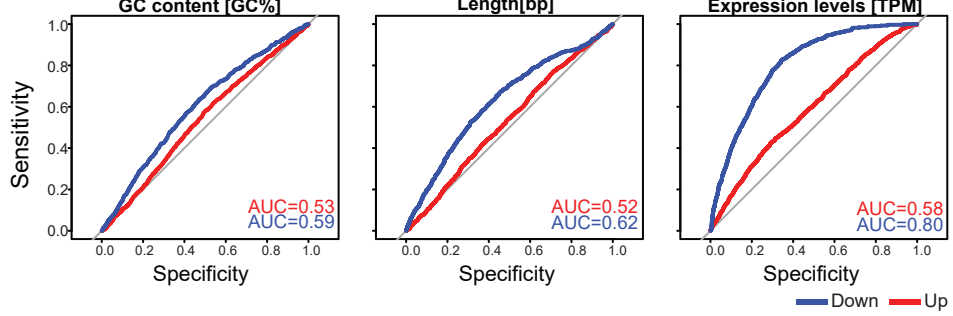

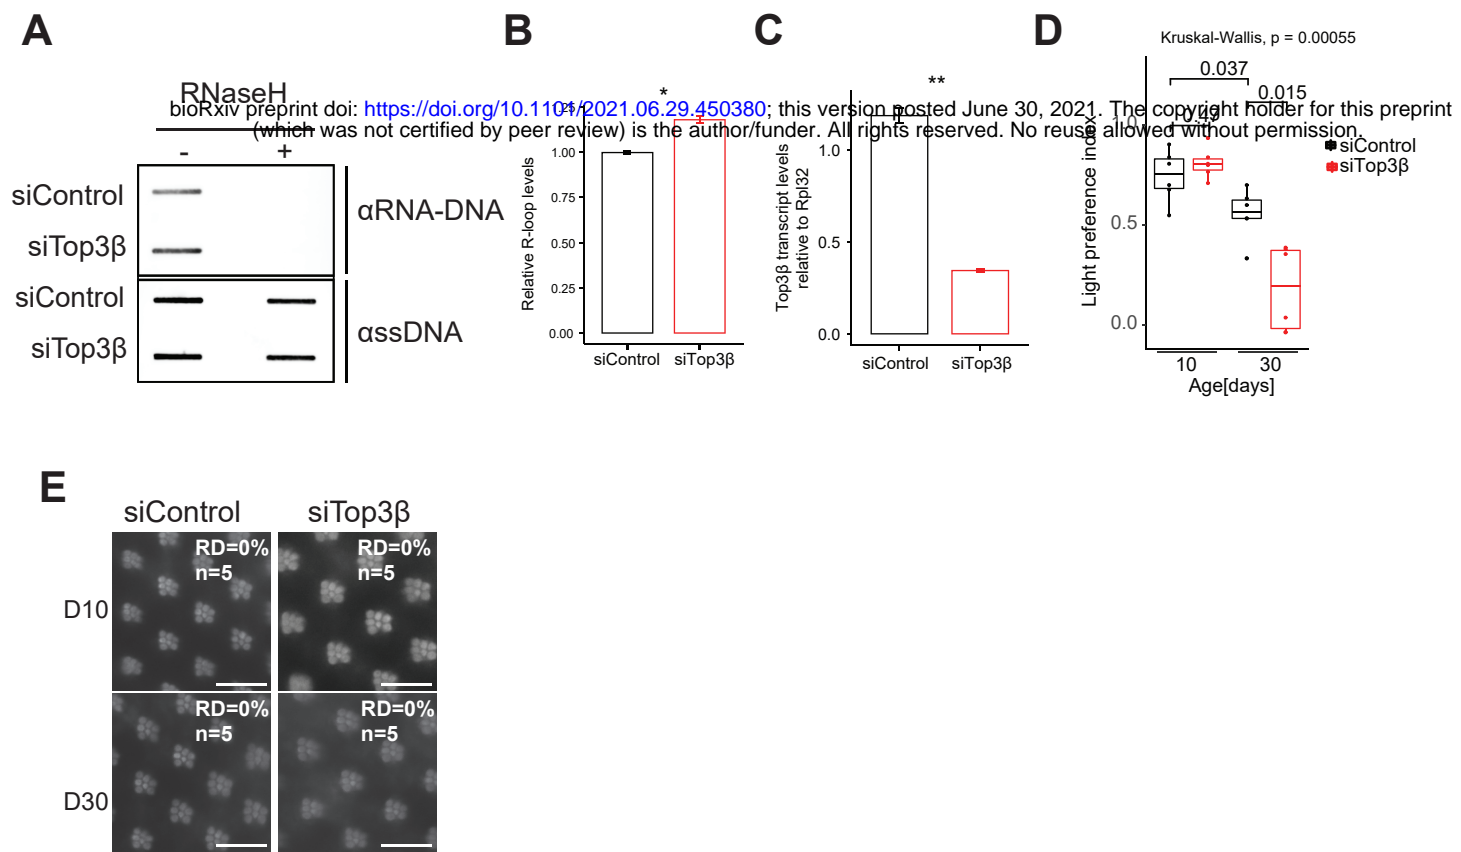

**A**

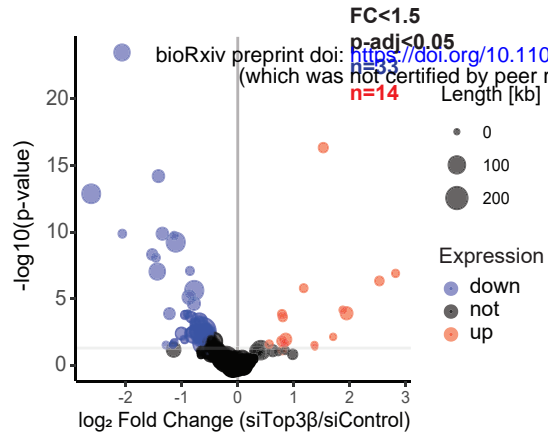

**B**

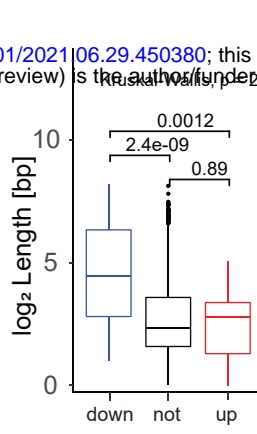

**C**

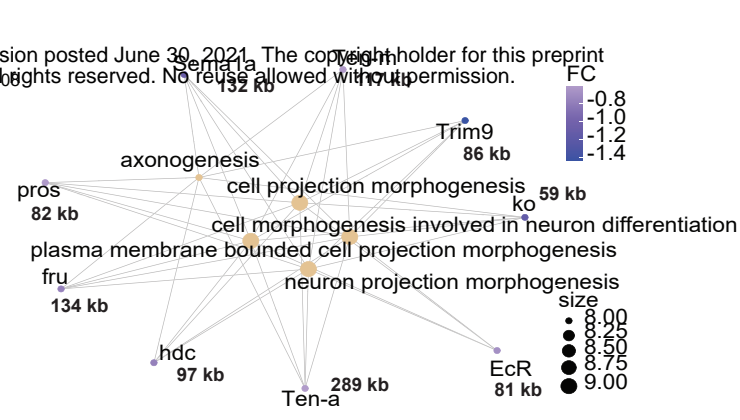

**D**

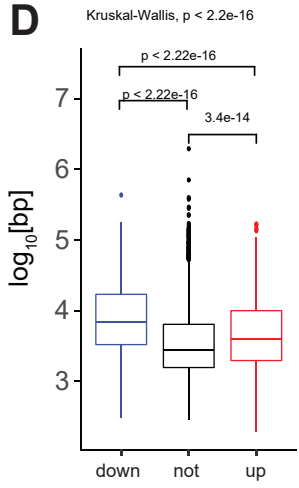

**E**

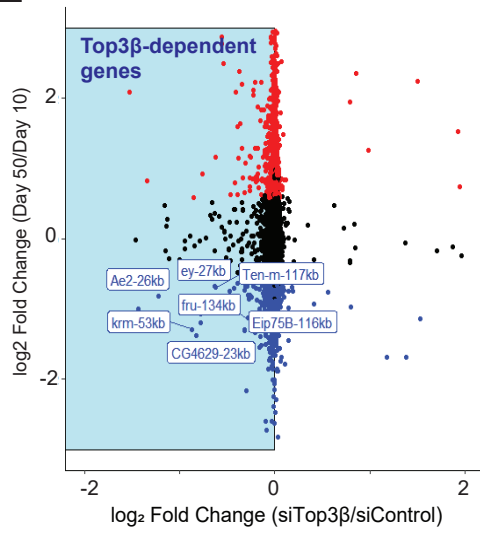

**F**

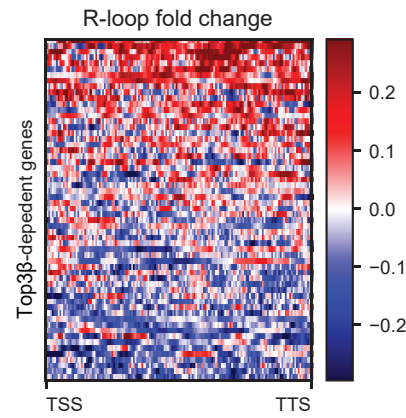

**G**

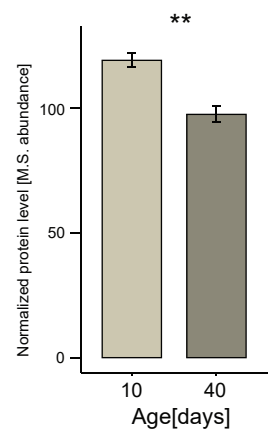

**A**

Rh1>CFP<sup>KASH</sup> Rh1>GFP<sup>KASH</sup>  
Rh1>siControl Rh1>siControl

bioRxiv preprint doi: <https://doi.org/10.1101/2021.06.29.450380>; this version posted June 30, 2021. The copyright holder for this preprint (which was not certified by peer review) is the author/funder. All rights reserved. No reuse allowed without permission.

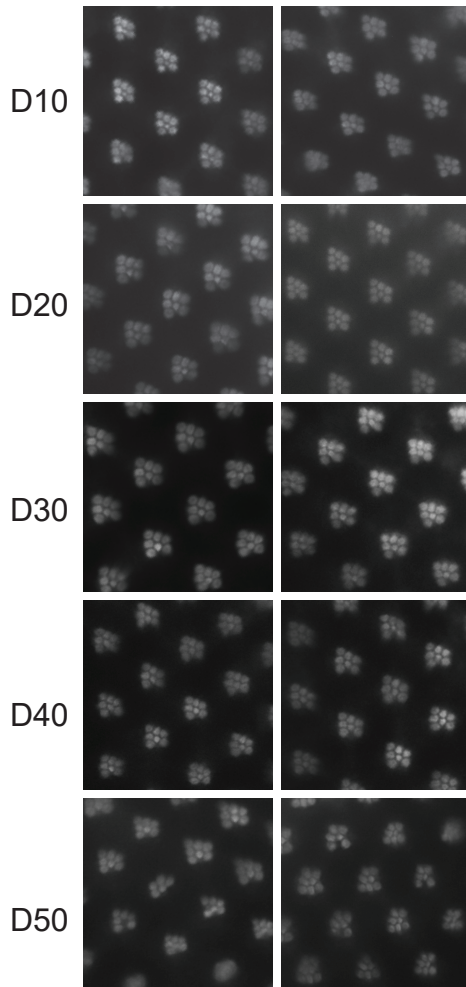



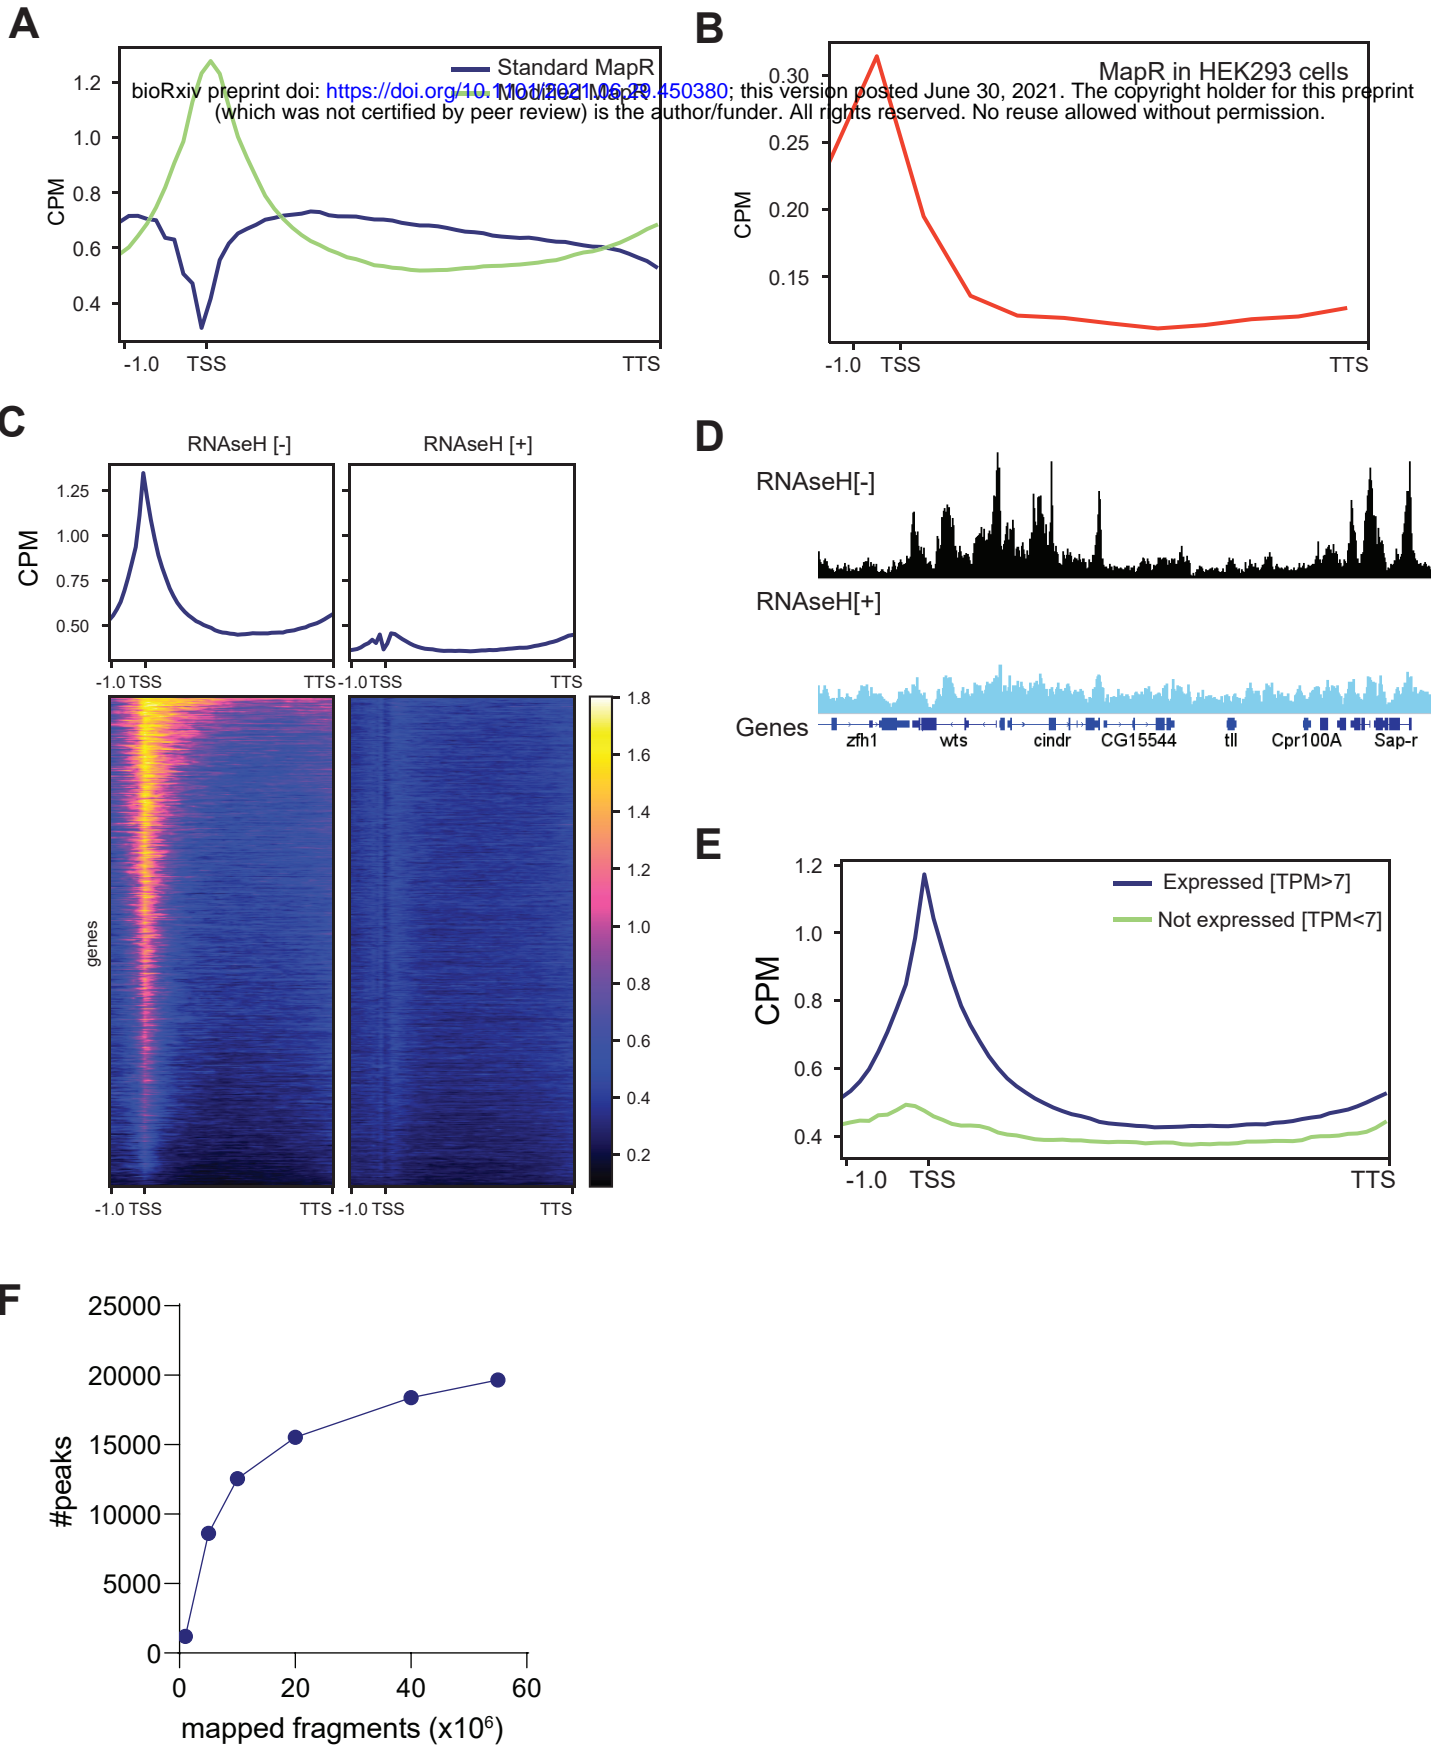

**A**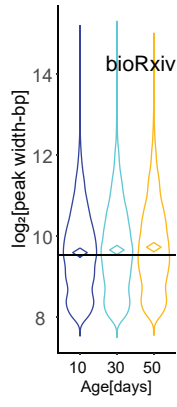**B**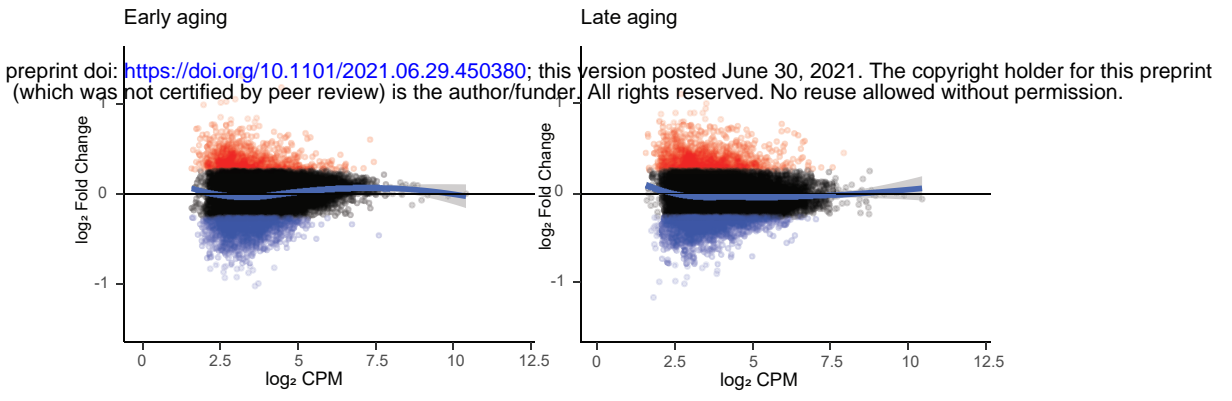

| Sample | # mapped fragments[x10 <sup>6</sup> ] |
|--------|---------------------------------------|
| D10-1  | 54784167                              |
| D10-2  | 47815025                              |
| D10-2  | 53697476                              |
| D30-1  | 44366144                              |
| D30-2  | 45811335                              |
| D30-3  | 35823854                              |
| D50-1  | 46970803                              |
| D50-2  | 42207867                              |
| D50-3  | 49960154                              |

bioRxiv preprint doi: <https://doi.org/10.1101/2021.06.29.450380>; this version posted June 30, 2021. The copyright holder for this preprint (which was not certified by peer review) is the author/funder. All rights reserved. No reuse allowed without permission.
